# Supplementary material for: α-Iminonitrile: a new cyanating agent for the palladium catalyzed C–H cyanation of arenes
Source: Royal Society of Chemistry journal article supplement (doi:10.1039/c6ra14512d), 2016-01-01

# **$\alpha$ -Iminonitrile: a new cyanating agent for the palladium catalyzed C-H cyanation of arenes**

Zhen-Bang Chen,<sup>†</sup> Fang-Ling Zhang,<sup>†</sup> Qing Yuan,<sup>†</sup> Hai-Fang Chen,<sup>†</sup> Yong-Ming  
Zhu,<sup>\*,†</sup> and Jing-Kang Shen<sup>\*,‡</sup>

<sup>†</sup>College of Pharmaceutical Sciences, Soochow University, Suzhou, 215123, China

<sup>‡</sup>Shanghai Institute of Materia Medica, Chinese Academy of Sciences, Shanghai,  
201203, China

|                                            |      |
|--------------------------------------------|------|
| Table of Contents                          | page |
| 1. General information.....                | 2    |
| 2. Experiment procedure.....               | 3    |
| 3. H/D exchange experiment.....            | 13   |
| 4. Kinetic isotope effect Experiments..... | 14   |
| 5. NMR spectra for the products.....       | 19   |

**1. General Information.** Unless otherwise noted, all solvents were dried and freshly distilled. TLC was performed on silica HSGF254 plates. Melting points were determined with a digital melting-point apparatus. NMR spectra were run in a solution of deuterated chloroform ( $\text{CDCl}_3$ ) with tetramethylsilane (TMS) as internal standard and were reported in parts per million (ppm).  $^1\text{H}$  and  $^{13}\text{C}$  NMR spectra were obtained at 400/101 MHz ( $^1\text{H}/^{13}\text{C}$ ), respectively. High-resolution mass spectra (HRMS) analyses were carried out on a chemical ionization (CI) apparatus using time-of-flight (TOF) mass spectrometry. Starting materials **1a**, **1d**, **1o**, **1e** were purchased from commercial suppliers and used without further purification. Other starting materials phenylpyridines **1b**, **1c**, **1e-1n**, **1p**, phenylpyrimidine **4a-4d**, phenylpyrazoles **4e-4h** and cyanating agents **2a-2g** were prepared by the reported procedures.<sup>1-3</sup>

**2. General procedure for the C-H cyanation.** To a solution of **1** or **4** (0.50 mmol),  $\alpha$ -iminonitrile (**2a**) (139.5 mg, 0.75 mmol), Pd(OAc)<sub>2</sub> (5.6 mg, 5 mol %), Cu(TFA)<sub>2</sub> (289 mg, 1.0 mmol) in THF (2.0 mL), the mixture was stirred at 120 °C for 24 h. At ambient temperature, the solvent was evaporated in vacuo and the remaining residue was purified by column chromatography on silica gel (petroleum ether/EtOAc 9/1) to yield products **3** or **5**.

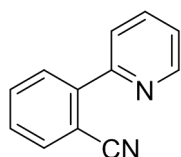

**2-(pyridin-2-yl)benzonitrile (3a).**<sup>4c</sup> Yellow solid (81 mg, 90% yield). Mp: 64-65 °C. <sup>1</sup>H NMR (400 MHz, CDCl<sub>3</sub>)  $\delta$  8.78 (d,  $J$  = 4.7 Hz, 1H), 7.82 (ddd,  $J$  = 19.1, 12.0, 6.5 Hz, 4H), 7.70 (t,  $J$  = 7.7 Hz, 1H), 7.52 (d,  $J$  = 6.6 Hz, 1H), 7.39 – 7.34 (m, 1H). <sup>13</sup>C NMR (101 MHz, CDCl<sub>3</sub>)  $\delta$  155.2 (s), 149.9 (s), 143.4 (s), 136.9 (s), 134.2 (s), 132.9 (s), 130.0 (s), 128.8 (s), 123.4 (s), 123.3 (s), 118.7 (s), 111.0 (s). LRMS (CI):  $m/z$  calcd for C<sub>12</sub>H<sub>8</sub>N<sub>2</sub>Na [M+Na]<sup>+</sup>, 180.1 ; found, 180.0.

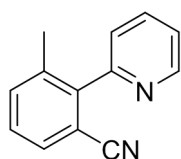

**3-methyl-2-(pyridin-2-yl)benzonitrile (3b).**<sup>4b</sup> Yellow oil (47 mg, 49% yield). <sup>1</sup>H NMR (400 MHz, CDCl<sub>3</sub>)  $\delta$  8.76 (d,  $J$  = 4.7 Hz, 1H), 7.84 (td,  $J$  = 7.7, 1.5 Hz, 1H), 7.60 (d,  $J$  = 7.7 Hz, 1H), 7.51 (d,  $J$  = 7.7 Hz, 1H), 7.39 (ddd,  $J$  = 12.5, 8.5, 6.5 Hz, 3H), 2.23 (s, 3H). <sup>13</sup>C NMR (101 MHz, CDCl<sub>3</sub>)  $\delta$  156.2 (s), 149.9 (s), 143.7 (s), 137.9 (s), 136.8 (s), 134.9 (s), 130.7 (s), 128.6 (s), 124.6 (s), 123.2 (s), 118.3 (s), 112.8 (s), 20.1 (s). LRMS (CI):  $m/z$  calcd for C<sub>13</sub>H<sub>10</sub>N<sub>2</sub>Na [M+Na]<sup>+</sup>, 217.1 ; found, 217.0.

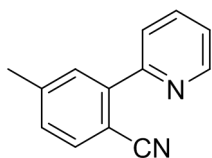

**4-methyl-2-(pyridin-2-yl)benzonitrile (3c).**<sup>4c</sup> White solid (67 mg, 69% yield). Mp: 63-65°C. <sup>1</sup>H NMR (400 MHz, CDCl<sub>3</sub>) δ 8.77 (d, *J* = 4.3 Hz, 1H), 7.85 – 7.76 (m, 2H), 7.67 (d, *J* = 8.1 Hz, 2H), 7.36 – 7.27 (m, 2H), 2.47 (s, 3H). <sup>13</sup>C NMR (101 MHz, CDCl<sub>3</sub>) δ 155.4 (s), 149.9 (s), 143.9 (s), 143.3 (s), 136.9 (s), 134.0 (s), 130.8 (s), 129.6 (s), 123.4 (s), 123.3 (s), 119.0 (s), 108.0 (s), 21.9 (s). LRMS (CI): *m/z* calcd for C<sub>13</sub>H<sub>10</sub>N<sub>2</sub>Na [M+Na]<sup>+</sup>, 217.1 ; found, 217.0.

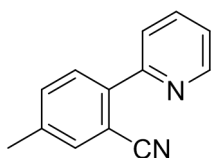

**5-methyl-2-(pyridin-2-yl)benzonitrile (3d).**<sup>4d</sup> White solid (82 mg, 85% yield). Mp: 76-78°C. <sup>1</sup>H NMR (400 MHz, CDCl<sub>3</sub>) δ 8.77 (d, *J* = 4.2 Hz, 1H), 7.82 (t, *J* = 7.7 Hz, 1H), 7.78 – 7.72 (m, 2H), 7.60 (s, 1H), 7.49 (d, *J* = 8.0 Hz, 1H), 7.37 – 7.31 (m, 1H), 2.43 (s, 3H). <sup>13</sup>C NMR (101 MHz, CDCl<sub>3</sub>) δ 155.2 (s), 149.8 (s), 140.6 (s), 139.2 (s), 136.9 (s), 134.5 (s), 133.8 (s), 129.9 (s), 128.3 (s), 123.2 (s), 118.9 (s), 110.8 (s), 20.9 (s). LRMS (CI): *m/z* calcd for C<sub>13</sub>H<sub>10</sub>N<sub>2</sub>Na [M+Na]<sup>+</sup>, 217.1 ; found, 217.0.

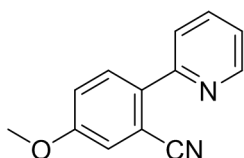

**5-methoxy-2-(pyridin-2-yl)benzonitrile (3e).**<sup>4c</sup> White solid (94 mg, 90% yield). Mp: 105-107°C. <sup>1</sup>H NMR (400 MHz, CDCl<sub>3</sub>) δ 8.94 (s, 1H), 8.11 (t, *J* = 7.3 Hz, 1H), 7.94 (d, *J* = 6.0 Hz, 1H), 7.82 (d, *J* = 8.3 Hz, 1H), 7.61 (s, 1H), 7.32 (t, *J* = 6.9 Hz, 2H), 3.92 (s, 3H). <sup>13</sup>C NMR (101 MHz, CDCl<sub>3</sub>) δ 160.8 (s), 153.2 (s), 147.2 (s), 140.4

(s), 132.2 (s), 131.8 (s), 125.2 (s), 124.2 (s), 119.5 (s), 119.4 (s), 117.9 (s), 112.4 (s), 56.1 (s). LRMS (CI):  $m/z$  calcd for  $C_{13}H_{10}N_2ONa$   $[M+Na]^+$ , 233.1 ; found, 233.0.

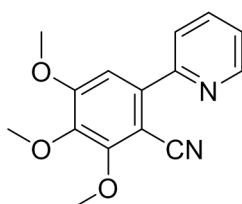

**2,3,4-trimethoxy-6-(pyridin-2-yl)benzonitrile (3f).** White solid (90 mg, 67% yield). Mp: 147-149°C.  $^1H$  NMR (400 MHz,  $CDCl_3$ )  $\delta$  8.74 (d,  $J$  = 4.7 Hz, 1H), 7.84 – 7.78 (m, 2H), 7.35 (dd,  $J$  = 8.8, 4.6 Hz, 1H), 7.15 (s, 1H), 4.09 (s, 3H), 3.99 (s, 3H), 3.92 (s, 3H).  $^{13}C$  NMR (101 MHz,  $CDCl_3$ )  $\delta$  157.4 (s), 156.6 (s), 155.0 (s), 149.9 (s), 142.0 (s), 140.5 (s), 136.9 (s), 123.6 (s), 123.4 (s), 116.1 (s), 108.9 (s), 98.5 (s), 62.1 (s), 61.3 (s), 56.5 (s). HRMS (CI):  $m/z$  calcd for  $C_{15}H_{15}N_2O_3$   $[M+H]^+$ , 271.1083 ; found, 271.1075.

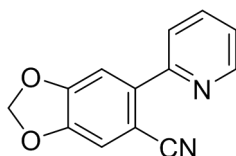

**6-(pyridin-2-yl)benzo[d][1,3]dioxole-5-carbonitrile (3g).** White solid (76 mg, 68% yield). Mp: 97-99°C.  $^1H$  NMR (400 MHz,  $CDCl_3$ )  $\delta$  8.73 (s, 1H), 7.84 – 7.65 (m, 2H), 7.36 – 7.26 (m, 2H), 7.16 – 7.02 (m, 1H), 6.19 (s, 1H), 6.12 (s, 1H).  $^{13}C$  NMR (101 MHz,  $CDCl_3$ )  $\delta$  154.94 (d,  $J$  = 2.7 Hz), 152.43 (s), 151.82 (s), 149.83 (d,  $J$  = 15.9 Hz), 148.37 (s), 148.07 (s), 140.49 (s), 136.90 (d,  $J$  = 3.0 Hz), 135.87 (s), 123.42 (d,  $J$  = 26.5 Hz), 122.83 (d,  $J$  = 37.6 Hz), 118.91 (s), 114.26 (s), 112.55 (s), 112.00 (s), 110.29 (s), 103.72 (s), 103.16 (s), 102.75 (s), 92.91 (s). HRMS (CI):  $m/z$  calcd for  $C_{13}H_9N_2O_2$   $[M+H]^+$ , 225.0664 ; found, 225.0663.

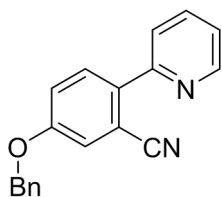

**5-(benzyloxy)-2-(pyridin-2-yl)benzonitrile (3h).**<sup>4d</sup> White solid (132 mg, 92% yield). Mp: 84-85°C. <sup>1</sup>H NMR (400 MHz, CDCl<sub>3</sub>) δ 8.74 (d, *J* = 4.9 Hz, 1H), 7.84 – 7.74 (m, 3H), 7.42 (q, *J* = 7.4 Hz, 4H), 7.39 – 7.27 (m, 4H), 5.14 (s, 2H). <sup>13</sup>C NMR (101 MHz, CDCl<sub>3</sub>) δ 158.8 (s), 155.0 (s), 149.8 (s), 137.1(s), 136.2 (s), 135.8 (s), 131.6 (s), 128.9 (s), 128.6 (s), 127.6 (s), 123.1 (s), 123.0 (s), 120.3 (s), 119.7 (s), 118.7 (s), 111.9 (s), 70.6 (s). LRMS (CI): *m/z* calcd for C<sub>19</sub>H<sub>14</sub>N<sub>2</sub>ONa [M+Na]<sup>+</sup>, 309.1 ; found, 308.9.

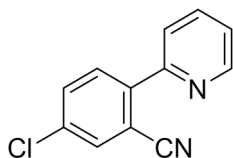

**5-chloro-2-(pyridin-2-yl)benzonitrile (3i).**<sup>4d</sup> White solid (74 mg, 69% yield). Mp: 165-166°C. <sup>1</sup>H NMR (400 MHz, CDCl<sub>3</sub>) δ 8.79 (d, *J* = 4.3 Hz, 1H), 7.90 – 7.74 (m, 4H), 7.67 (dd, *J* = 8.5, 2.1 Hz, 1H), 7.42 – 7.36 (m, 1H). <sup>13</sup>C NMR (101 MHz, CDCl<sub>3</sub>) δ 154.2 (s), 150.1 (s), 141.8 (s), 137.2 (s), 135.2 (s), 133.8 (s), 133.3 (s), 131.5 (s), 123.8 (s), 123.3 (s), 117.6 (s), 112.6 (s). LRMS (CI): *m/z* calcd for C<sub>12</sub>H<sub>7</sub>ClN<sub>2</sub>Na [M+Na]<sup>+</sup>, 237.0 ; found, 236.9.

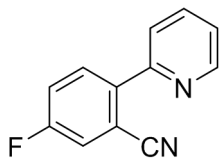

**5-fluoro-2-(pyridin-2-yl)benzonitrile (3j).**<sup>4d</sup> White solid (55 mg, 56% yield). Mp: 133-134°C. <sup>1</sup>H NMR (400 MHz, CDCl<sub>3</sub>) δ 8.77 (d, *J* = 4.7 Hz, 1H), 7.88 – 7.82 (m, 2H), 7.77 (d, *J* = 7.9 Hz, 1H), 7.50 (dd, *J* = 8.0, 2.5 Hz, 1H), 7.45 – 7.34 (m, 2H). <sup>13</sup>C

NMR (101 MHz, CDCl<sub>3</sub>)  $\delta$  163.73 (s), 160.39 (s), 154.29 (s), 150.03 (s), 139.98 (s), 137.08 (s), 132.25 (d,  $J$  = 8.4 Hz), 123.53 (s), 123.20 (s), 120.73 (dd,  $J$  = 23.0, 14.4 Hz), 117.59 (d,  $J$  = 1.2 Hz), 112.51 (d,  $J$  = 9.4 Hz). LRMS (CI):  $m/z$  calcd for C<sub>12</sub>H<sub>7</sub>FN<sub>2</sub>Na [M+Na]<sup>+</sup>, 221.1 ; found, 220.9.

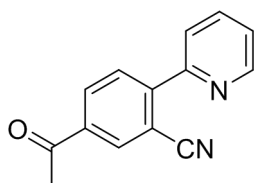

**5-acetyl-2-(pyridin-2-yl)benzonitrile (3k).**<sup>4d</sup> White solid (54 mg, 49% yield). Mp: 102-104°C. <sup>1</sup>H NMR (400 MHz, CDCl<sub>3</sub>)  $\delta$  8.82 (s, 1H), 8.38 (d,  $J$  = 1.6 Hz, 1H), 8.25 (d,  $J$  = 9.8 Hz, 1H), 7.99 (d,  $J$  = 8.2 Hz, 1H), 7.91 – 7.84 (m, 2H), 7.45 – 7.40 (m, 1H), 2.68 (s, 3H). <sup>13</sup>C NMR (101 MHz, CDCl<sub>3</sub>)  $\delta$  195.7 (s), 154.2 (s), 150.3 (s), 147.0 (s), 137.2 (s), 137.1 (s), 134.4 (s), 132.3 (s), 130.6 (s), 124.2 (s), 123.6 (s), 118.1 (s), 111.8 (s), 26.8 (s). LRMS (CI):  $m/z$  calcd for C<sub>14</sub>H<sub>10</sub>N<sub>2</sub>ONa [M+Na]<sup>+</sup>, 245.1 ; found, 244.9.

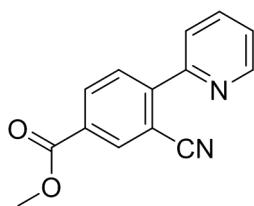

**methyl 3-cyano-4-(pyridin-2-yl)benzoate (3l).**<sup>4d</sup> White solid (101 mg, 85% yield). Mp: 91-92°C. <sup>1</sup>H NMR (400 MHz, CDCl<sub>3</sub>)  $\delta$  8.83 (d,  $J$  = 4.3 Hz, 1H), 8.47 (d,  $J$  = 1.3 Hz, 1H), 8.33 (dd,  $J$  = 8.2, 1.6 Hz, 1H), 7.93 (dd,  $J$  = 13.8, 8.6 Hz, 2H), 7.85 (d,  $J$  = 7.8 Hz, 1H), 7.47 – 7.43 (m, 1H), 3.99 (s, 3H). <sup>13</sup>C NMR (101 MHz, CDCl<sub>3</sub>)  $\delta$  165.1 (s), 154.1 (s), 150.0 (s), 146.7 (s), 137.4 (s), 135.5 (s), 133.7 (s), 130.9 (s), 130.4 (s), 124.2 (s), 123.7 (s), 117.9 (s), 111.6 (s), 52.9 (s). LRMS (CI):  $m/z$  calcd for

C<sub>14</sub>H<sub>10</sub>N<sub>2</sub>O<sub>2</sub>Na [M+Na]<sup>+</sup>, 261.1 ; found, 260.9.

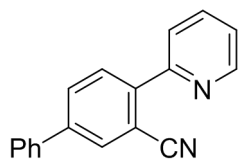

**4-(pyridin-2-yl)-[1,1'-biphenyl]-3-carbonitrile (3m).**<sup>4d</sup> White solid (82 mg, 63% yield). Mp: 68-69°C. <sup>1</sup>H NMR (400 MHz, CDCl<sub>3</sub>) δ 8.79 (s, 1H), 8.01 (s, 1H), 7.91 (q, *J* = 8.1 Hz, 2H), 7.84 (s, 2H), 7.62 (d, *J* = 7.4 Hz, 2H), 7.49 (t, *J* = 7.1 Hz, 2H), 7.43 (d, *J* = 7.2 Hz, 1H), 7.36 (s, 1H). <sup>13</sup>C NMR (101 MHz, CDCl<sub>3</sub>) δ 155.0 (s), 150.1 (s), 142.1 (s), 142.0 (s), 138.5 (s), 137.1 (s), 132.8 (s), 131.6 (s), 130.6 (s), 129.3 (s), 128.7 (s), 127.2 (s), 123.5 (s), 123.3 (s), 118.9 (s), 111.6 (s). LRMS (CI): *m/z* calcd for C<sub>18</sub>H<sub>12</sub>N<sub>2</sub>Na [M+Na]<sup>+</sup>, 279.1 ; found, 279.0.

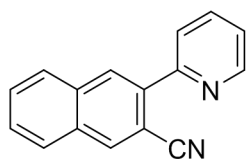

**3-(pyridin-2-yl)-2-naphthonitrile (3n).**<sup>4d</sup> White solid (100 mg, 87% yield). Mp: 154-156°C. <sup>1</sup>H NMR (400 MHz, CDCl<sub>3</sub>) δ 8.94 (d, *J* = 4.5 Hz, 1H), 8.43 (s, 1H), 8.33 (s, 1H), 8.09 (td, *J* = 7.9, 1.2 Hz, 1H), 7.98 (dd, *J* = 15.2, 8.0 Hz, 3H), 7.75 – 7.66 (m, 2H), 7.59 (dd, *J* = 6.6, 5.5 Hz, 1H). <sup>13</sup>C NMR (101 MHz, CDCl<sub>3</sub>) δ 154.1 (s), 147.9 (s), 139.6 (s), 136.9 (s), 134.5 (s), 134.4 (s), 132.3 (s), 130.9 (s), 130.1 (s), 129.0 (s), 128.9 (s), 128.3 (s), 125.1 (s), 124.2 (s), 118.5 (s), 108.3 (s). LRMS (CI): *m/z* calcd for C<sub>16</sub>H<sub>10</sub>N<sub>2</sub>Na [M+Na]<sup>+</sup>, 253.1 ; found, 253.0.

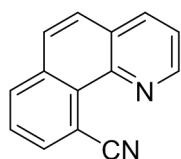

**benzo[h]quinoline-10-carbonitrile (3o).**<sup>4d</sup> White solid (79 mg, 77% yield). Mp:



139-141°C.  $^1\text{H}$  NMR (400 MHz,  $\text{CDCl}_3$ )  $\delta$  9.13 – 9.09 (m, 1H), 8.19 (d,  $J = 8.1$  Hz, 1H), 8.10 (dd,  $J = 16.1, 7.7$  Hz, 2H), 7.80 – 7.68 (m, 3H), 7.60 (dd,  $J = 8.0, 4.3$  Hz, 1H).  $^{13}\text{C}$  NMR (101 MHz,  $\text{CDCl}_3$ )  $\delta$  148.6 (s), 144.5 (s), 136.3 (s), 135.8 (s), 134.1 (s), 132.8 (s), 127.5 (s), 127.3 (s), 127.2 (s), 127.0 (s), 123.2 (s), 120.9 (s), 109.0 (s).

LRMS (CI):  $m/z$  calcd for  $\text{C}_{14}\text{H}_8\text{N}_2\text{Na}$   $[\text{M}+\text{Na}]^+$ , 227.1 ; found, 227.0.

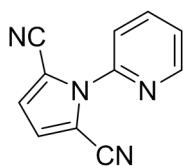

**1-(pyridin-2-yl)-1H-pyrrole-2,5-dicarbonitrile (3p).** White solid (39 mg, 40% yield). Mp: 165-167°C.  $^1\text{H}$  NMR (400 MHz,  $\text{CDCl}_3$ )  $\delta$  8.70 (dd,  $J = 4.8, 1.0$  Hz, 1H), 8.00 (td,  $J = 8.0, 1.8$  Hz, 1H), 7.64 (d,  $J = 8.1$  Hz, 1H), 7.51 (ddd,  $J = 7.5, 4.9, 0.7$  Hz, 1H), 7.03 (s, 2H).  $^{13}\text{C}$  NMR (101 MHz,  $\text{CDCl}_3$ )  $\delta$  150.0 (s), 147.7 (s), 139.6 (s), 125.0 (s), 121.7 (s), 118.6 (s), 111.7 (s), 108.9 (s). HRMS (CI):  $m/z$  calcd for  $\text{C}_{11}\text{H}_7\text{N}_4$   $[\text{M}+\text{H}]^+$ , 195.0671 ; found, 195.0667.

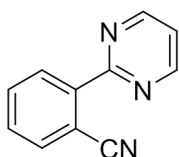

**2-(pyrimidin-2-yl)benzonitrile (5a).**<sup>4d</sup> White solid (61 mg, 67% yield). Mp: 138-139°C.  $^1\text{H}$  NMR (400 MHz,  $\text{CDCl}_3$ )  $\delta$  8.93 (d,  $J = 4.9$  Hz, 2H), 8.37 (d,  $J = 8.0$  Hz, 1H), 7.86 (d,  $J = 7.7$  Hz, 1H), 7.72 (t,  $J = 7.7$  Hz, 1H), 7.58 (t,  $J = 7.6$  Hz, 1H), 7.34 (t,  $J = 4.9$  Hz, 1H).  $^{13}\text{C}$  NMR (101 MHz,  $\text{CDCl}_3$ )  $\delta$  162.9 (s), 157.5 (s), 140.4 (s), 135.2 (s), 132.7 (s), 130.6 (s), 130.4 (s), 120.3 (s), 119.0 (s), 111.9 (s), 91.5 (s). LRMS (CI):  $m/z$  calcd for  $\text{C}_{11}\text{H}_7\text{N}_3\text{Na}$   $[\text{M}+\text{Na}]^+$ , 204.1 ; found, 204.0.

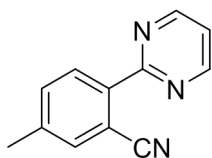

**5-methyl-2-(pyrimidin-2-yl)benzonitrile (5b).**<sup>4e</sup> White solid (70 mg, 72% yield).

Mp: 172-174°C. <sup>1</sup>H NMR (400 MHz, CDCl<sub>3</sub>) δ 8.90 (d, *J* = 4.8 Hz, 2H), 8.27 (d, *J* = 8.1 Hz, 1H), 7.66 (s, 1H), 7.51 (d, *J* = 8.1 Hz, 1H), 7.30 (t, *J* = 4.9 Hz, 1H), 2.46 (s, 3H). <sup>13</sup>C NMR (101 MHz, CDCl<sub>3</sub>) δ 165.0 (s), 157.3 (s), 141.2 (s), 135.0 (s), 130.2 (s), 129.5 (s), 128.2 (s), 118.9 (s), 115.3 (s), 21.6 (s). LRMS (CI): *m/z* calcd for C<sub>12</sub>H<sub>9</sub>N<sub>3</sub>Na [M+Na]<sup>+</sup>, 218.1 ; found, 218.0.

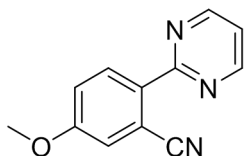

**5-methoxy-2-(pyrimidin-2-yl)benzonitrile (5c).**<sup>4e</sup> White solid (36 mg, 34% yield).

Mp: 127-129°C. <sup>1</sup>H NMR (400 MHz, CDCl<sub>3</sub>) δ 8.88 (d, *J* = 2.2 Hz, 2H), 8.35 (d, *J* = 8.9 Hz, 1H), 7.33 (d, *J* = 2.6 Hz, 1H), 7.27 (t, *J* = 4.8 Hz, 1H), 7.22 (dd, *J* = 8.9, 2.6 Hz, 1H), 3.91 (s, 3H). <sup>13</sup>C NMR (101 MHz, CDCl<sub>3</sub>) δ 162.7 (s), 160.9 (s), 157.3 (s), 132.8 (s), 132.1 (s), 119.9 (s), 119.7 (s), 118.9 (s), 113.0 (s), 55.9 (s). LRMS (CI): *m/z* calcd for C<sub>12</sub>H<sub>9</sub>N<sub>3</sub>Na [M+Na]<sup>+</sup>, 234.1 ; found, 233.9.

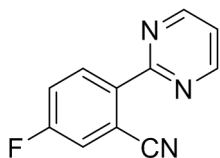

**5-fluoro-2-(pyrimidin-2-yl)benzonitrile (5d).**<sup>4e</sup> White solid (46 mg, 46% yield).

Mp: 170-172°C. <sup>1</sup>H NMR (400 MHz, CDCl<sub>3</sub>) δ 8.91 (d, *J* = 4.9 Hz, 2H), 8.43 (dd, *J* = 8.9, 5.6 Hz, 1H), 7.55 (dd, *J* = 8.1, 2.6 Hz, 1H), 7.42 (td, *J* = 8.8, 2.6 Hz, 1H), 7.33 (t, *J* = 4.9 Hz, 1H). <sup>13</sup>C NMR (101 MHz, CDCl<sub>3</sub>) δ 163.96 (s), 162.28 (s), 162.02 (s),

157.46 (s), 136.74 (d,  $J = 3.4$  Hz), 132.88 (d,  $J = 8.7$  Hz), 122.05 (s), 121.88 (s), 120.24 (t,  $J = 10.6$  Hz), 117.80 (s), 113.65 (d,  $J = 9.4$  Hz). LRMS (CI):  $m/z$  calcd for  $C_{11}H_6FN_3Na$   $[M+Na]^+$ , 222.1 ; found, 221.9.

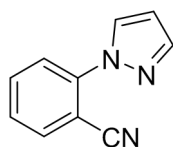

**2-(1H-pyrazol-1-yl)benzonitrile (5e).**<sup>4d</sup> Yellow oil (62 mg, 73% yield).  $^1H$  NMR (400 MHz,  $CDCl_3$ )  $\delta$  8.24 – 8.16 (m, 1H), 7.87 (dd,  $J = 13.8, 6.2$  Hz, 3H), 7.80 (s, 1H), 7.51 (dd,  $J = 15.4, 7.8$  Hz, 1H), 6.62 (s, 1H).  $^{13}C$  NMR (101 MHz,  $CDCl_3$ )  $\delta$  142.4 (s), 142.1 (s), 134.6 (s), 134.1 (s), 129.6 (s), 127.3 (s), 124.4 (s), 117.1 (s), 108.6 (s), 105.4 (s). LRMS (CI):  $m/z$  calcd for  $C_{10}H_7N_3Na$   $[M+Na]^+$ , 192.1 ; found, 192.0.

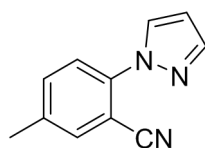

**5-methyl-2-(1H-pyrazol-1-yl)benzonitrile (5f).**<sup>4f</sup> White solid (59 mg, 65% yield). Mp: 64-66°C.  $^1H$  NMR (400 MHz,  $CDCl_3$ )  $\delta$  8.09 (d,  $J = 2.2$  Hz, 1H), 7.80 (s, 1H), 7.66 (d,  $J = 8.4$  Hz, 1H), 7.57 (s, 1H), 7.50 (d,  $J = 8.3$  Hz, 1H), 6.53 (s, 1H), 2.43 (s, 3H).  $^{13}C$  NMR (101 MHz,  $CDCl_3$ )  $\delta$  140.9 (s), 138.1 (s), 136.3 (s), 130.0 (s), 126.8 (s), 119.3 (s), 107.4 (s), 21.0 (s). LRMS (CI):  $m/z$  calcd for  $C_{11}H_9N_3Na$   $[M+Na]^+$ , 206.1 ; found, 206.0.

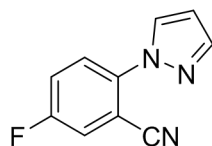

**5-fluoro-2-(1H-pyrazol-1-yl)benzonitrile (5g).**<sup>4f</sup> White solid (53 mg, 57% yield). Mp: 99-101°C.  $^1H$  NMR (400 MHz,  $CDCl_3$ )  $\delta$  8.08 (d,  $J = 2.3$  Hz, 1H), 7.83 – 7.75

(m, 2H), 7.51 – 7.41 (m, 2H), 6.56 (s, 1H).  $^{13}\text{C}$  NMR (101 MHz,  $\text{CDCl}_3$ )  $\delta$  161.68 (s), 159.18 (s), 142.48 (s), 138.87 (s), 129.79 (s), 126.74 (d,  $J = 8.5$  Hz), 121.89 (s), 121.67 (s), 120.93 (s), 120.68 (s), 115.78 (s), 108.73 (s), 106.93 (d,  $J = 9.5$  Hz). LRMS (CI):  $m/z$  calcd for  $\text{C}_{10}\text{H}_6\text{FN}_3\text{Na}$   $[\text{M}+\text{Na}]^+$ , 210.1 ; found, 209.9.

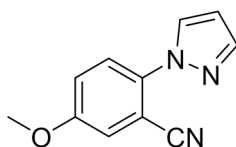

**5-methoxy-2-(1H-pyrazol-1-yl)benzonitrile (5h).** White solid (61 mg, 61% yield). Mp: 92-94°C.  $^1\text{H}$  NMR (400 MHz,  $\text{CDCl}_3$ )  $\delta$  7.99 (d,  $J = 2.3$  Hz, 1H), 7.78 (s, 1H), 7.67 – 7.62 (m, 1H), 7.25 – 7.20 (m, 2H), 6.53 – 6.50 (m, 1H), 3.88 (s, 3H).  $^{13}\text{C}$  NMR (101 MHz,  $\text{CDCl}_3$ )  $\delta$  158.4 (s), 141.9 (s), 135.9 (s), 129.8 (s), 126.4 (s), 118.0 (s), 116.7 (s), 108.1 (s), 106.9 (s), 56.1 (s). HRMS (CI):  $m/z$  calcd for  $\text{C}_{11}\text{H}_{10}\text{N}_3\text{O}$   $[\text{M}+\text{H}]^+$ , 200.0824 ; found, 200.0817.

### 3. H/D Exchange Experiment: <sup>4d</sup>

A suspension of 2-phenylpyridine (**1a**) (78 mg, 0.50 mmol), Pd(OAc)<sub>2</sub> (5.6 mg, 5 mol %), Cu(TFA)<sub>2</sub> (289 mg, 1.0 mmol), CD<sub>3</sub>OD (72 mg, 2.0 mmol) in THF (2.0 ml) was stirred at 120 °C for 24 h. At ambient temperature, the reaction mixture was evaporated in vacuo and the remaining residue was purified by column chromatography on silica gel to afford [D]n-**1a** as a slight yellow oil. The D-incorporation in [D]-**1a** was estimated by <sup>1</sup>H-NMR spectroscopy.

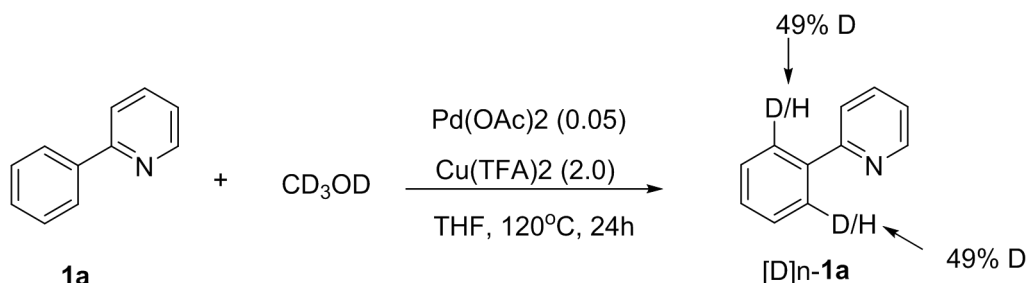

<sup>1</sup>H NMR spectra of compound [D]n-**1a**

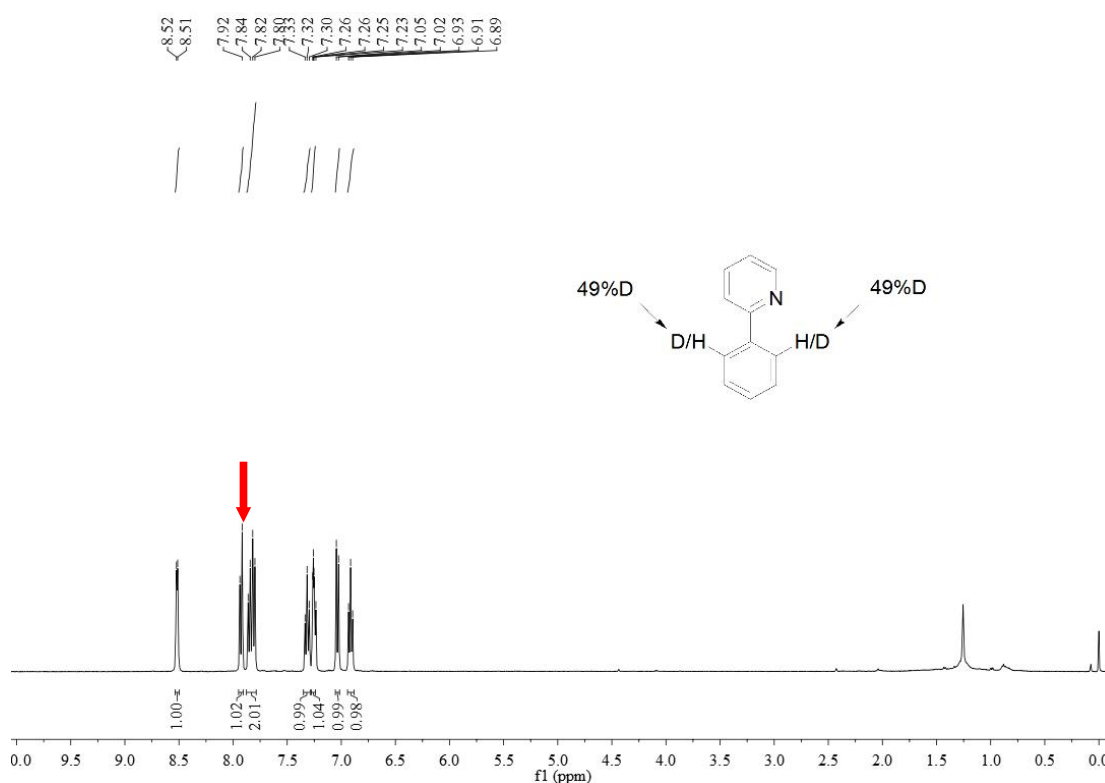

#### 4. Kinetic isotope effect (KIE) Experiments: <sup>4c</sup>

##### 4.1 Intramolecular competition experiment:

A suspension of 2-[D]-phenylpyridine ([D]-**1a**) (46.8 mg, 0.3 mmol), **2a** (83 mg, 0.45 mmol), Pd(OAc)<sub>2</sub> (3.4mg, 5 mol %), Cu(TFA)<sub>2</sub> (173 mg, 0.6 mmol) in THF (1.0 mL) was stirred at 120 °C for 150 min. At ambient temperature, the reaction mixture was evaporated in vacuo and the remaining residue was purified by column chromatography on silica gel to afford [D]-**3a** (10 mg, 18%) as a solid. The D-incorporation in [D]-**3a** was estimated by <sup>1</sup>H-NMR spectroscopy.

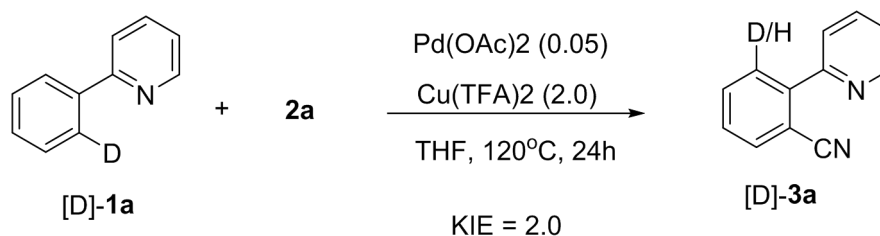

<sup>1</sup>H NMR spectra of compound [D]-**3a**

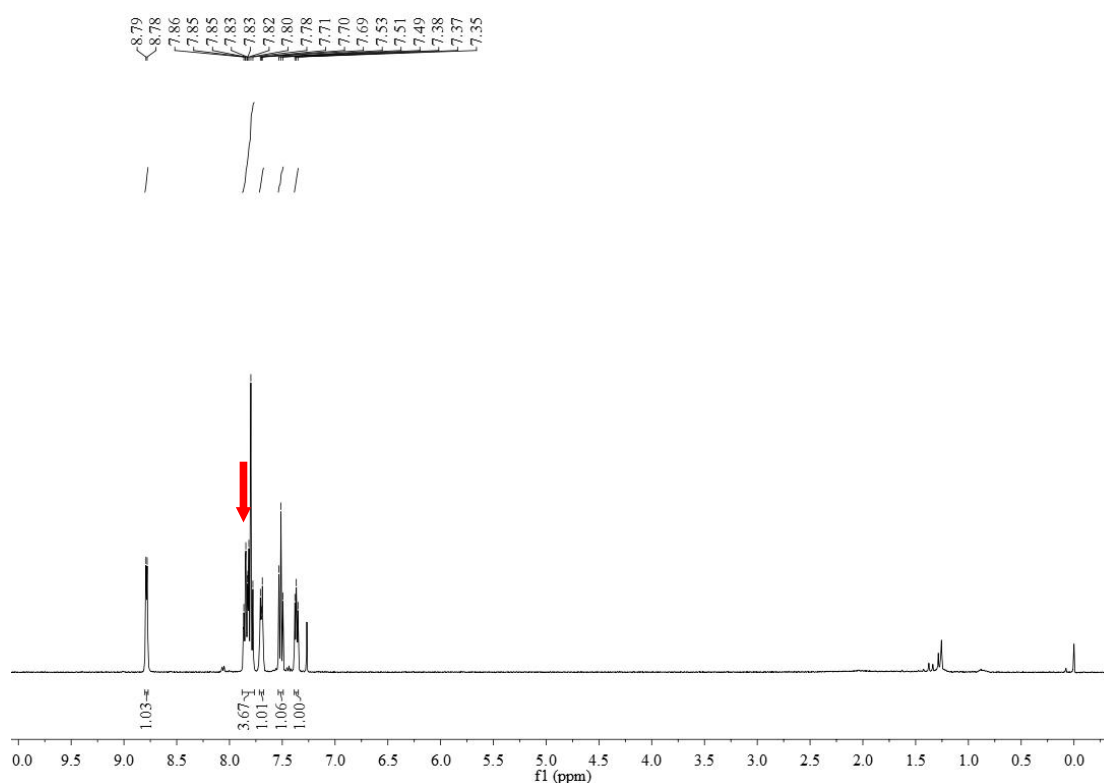

## 4.2 Parallel experiments:

Two parallel reactions with **1a** and deuterate substrate  $[D]_5\text{-1a}$  under the standard conditions proceeded: A suspension of substrates **1a** (46.8 mg, 0.3 mmol) or  $[D]_5\text{-1a}$  (48 mg, 0.3 mmol), **2a** (83 mg, 0.45 mmol),  $\text{Pd}(\text{OAc})_2$  (3.4mg, 5 mol %),  $\text{Cu}(\text{TFA})_2$  (173 mg, 0.6 mmol) in THF (1.0 mL) was stirred at 120 °C for 150 min, respectively. At ambient temperature, the reaction mixture was evaporated in vacuo and the remaining residue was purified by column chromatography on silica gel to afford  $\text{H}_4/[D]_4\text{-3a}$  (8 mg, 15%) as a solid. The H/D-incorporation in  $\text{H}_4/[D]_4\text{-3a}$  was estimated by  $^1\text{H}$ -NMR spectroscopy.

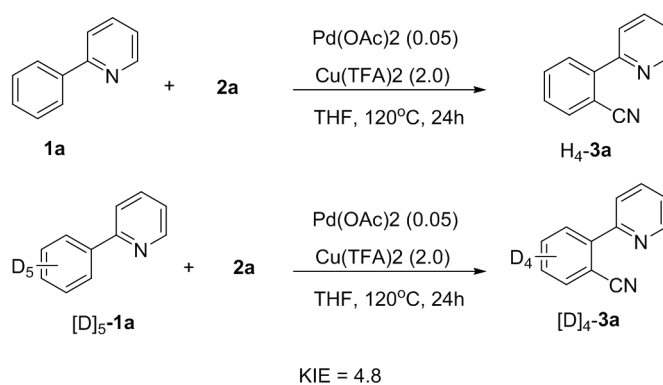

$^1\text{H}$  NMR spectra of compound  $\text{H}_4/[D]_4\text{-3a}$

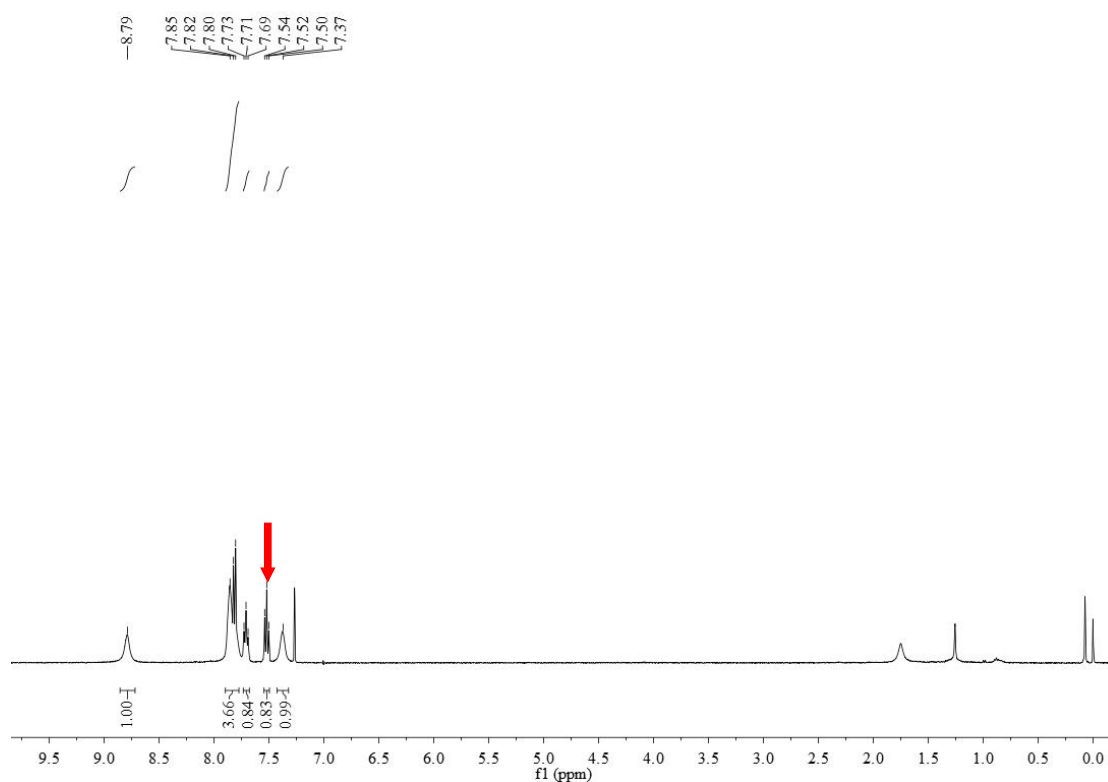

### 4.3 Intermolecular competition experiment:

A sealed tube with **1a** and deuterate substrate [D]<sub>5</sub>-**1a** under the standard conditions proceeded:

To a sealed tube, **1a** (23.4 mg, 0.15 mmol) and [D]<sub>5</sub>-**1a** (24 mg, 0.15 mmol), **2a** (83 mg, 0.45 mmol), Pd(OAc)<sub>2</sub> (3.4mg, 5 mol %), Cu(TFA)<sub>2</sub> (173 mg, 0.6 mmol) THF (1.0 mL) were added and stirred at 120 °C for 150 min. At ambient temperature, the reaction mixture was evaporated in vacuo and the remaining residue was purified by column chromatography on silica gel to afford H<sub>4</sub>/[D]<sub>4</sub>-**3a** (9 mg, 17%) as a solid. The H/D-incorporation in H<sub>4</sub>/[D]<sub>4</sub>-**3a** was estimated by <sup>1</sup>H-NMR spectroscopy.



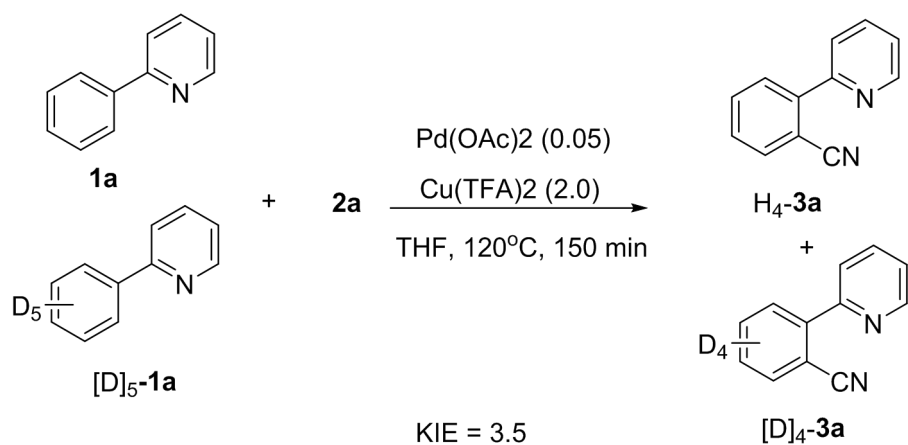

<sup>1</sup>H NMR spectra of compound H<sub>4</sub>/[D]<sub>4</sub>-**3a**

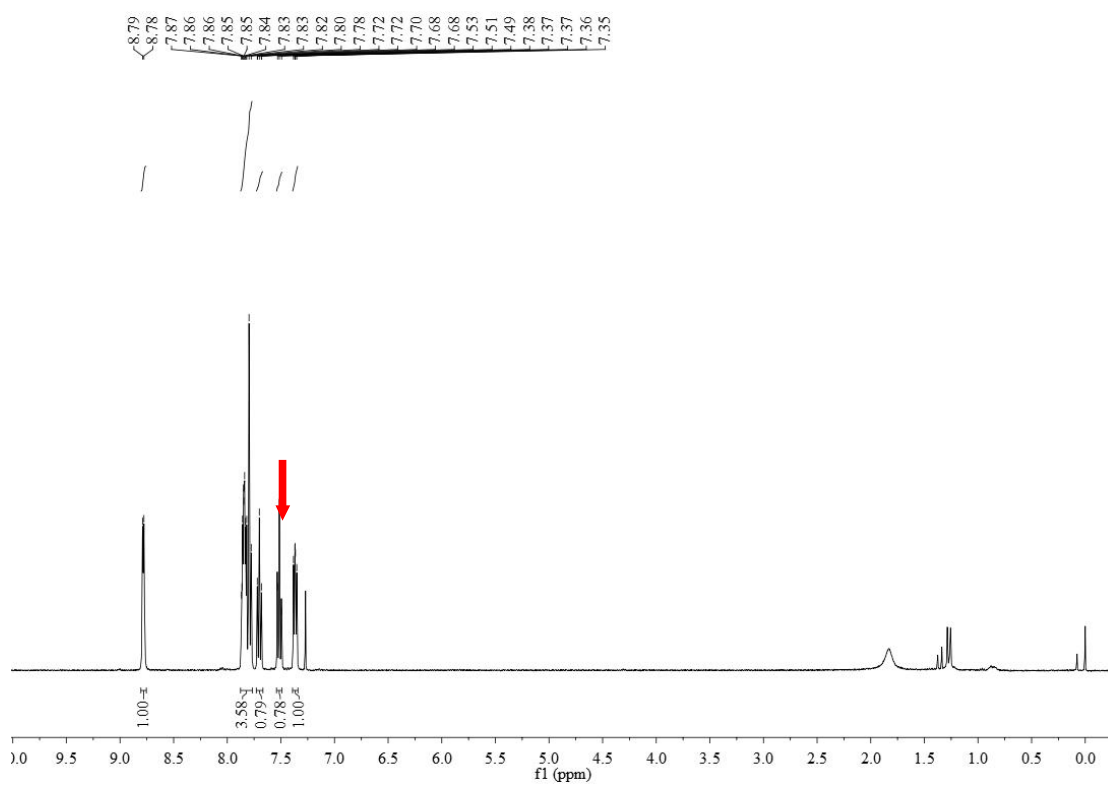

## References:

(1) X.-Z. Kou, M.-D. Zhao, X.-X. Qiao, Y.-M. Zhu, X.-F. Tong and Z.-M. Shen *Chem. Eur. J.*, 2013, **19**, 16880.

(2) A. F. de Brito, J. L. R. Martins, J. O. Fajemiroye, P. M. Galdino, T. C. M. De Lima, R. Menegatti and E. A. Costa, *Life Sciences*, 2012, **90**, 910.

(3) (a) Z.-B. Chen, Y. Zhang, Q. Yuan, F.-L. Zhang, Y.-M. Zhu and J.-K. Shen, *J. Org. Chem.*, 2016, **81**, 1610. (b) Fontaine, P.; Chiaroni, A. L.; Masson, G.; Zhu, J. P. *Org. Lett.* **2008**, *10*, 1509.

(4) (a) C. Liu, N. Han, X.-X. Song, and J.-S. Qiu *Eur. J. Org. Chem.* 2010, 5548. (b) J. Jin, Q. Wen, P. Lu and Y. Wang, *Chem. Commun.*, 2012, **48**, 9933. (c) J. Li, L. Ackermann, *Angew. Chem.* 2015, **127**, 3906; *Angew. Chem. Int. Ed.* 2015, **54**, 3635. (d) A. B. Pawar and S. Chang, *Org. Lett.*, 2015, **17**, 660. (e) X. Hong, H. Wang, G. Qian, Q. Tan and B. Xu, *J. Org. Chem.*, 2014, **79**, 3228. (f) X.-F. Jia, D.-P. Yang, W.-H. Wang, F. Luo, and J. Cheng *J. Org. Chem.* 2009, **74**, 9470.

## 5. NMR spectra for the products

### $^1\text{H}$ NMR spectrum of compound **3a**

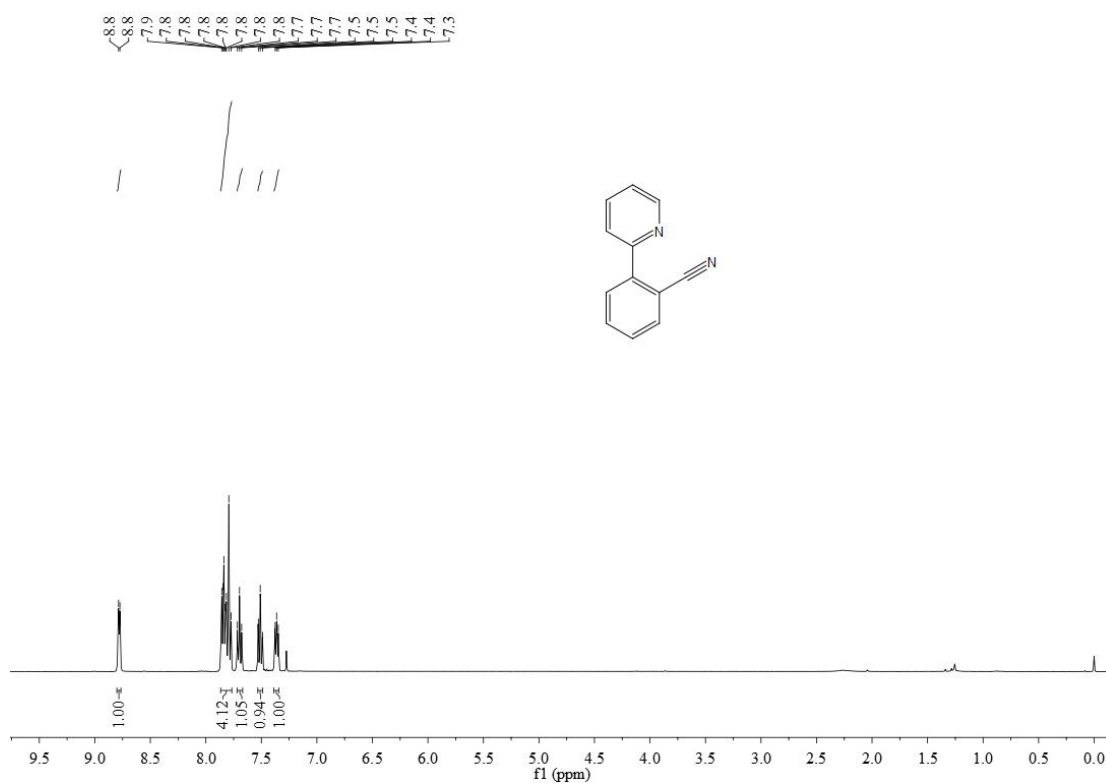

### $^{13}\text{C}$ NMR spectrum of compound **3a**

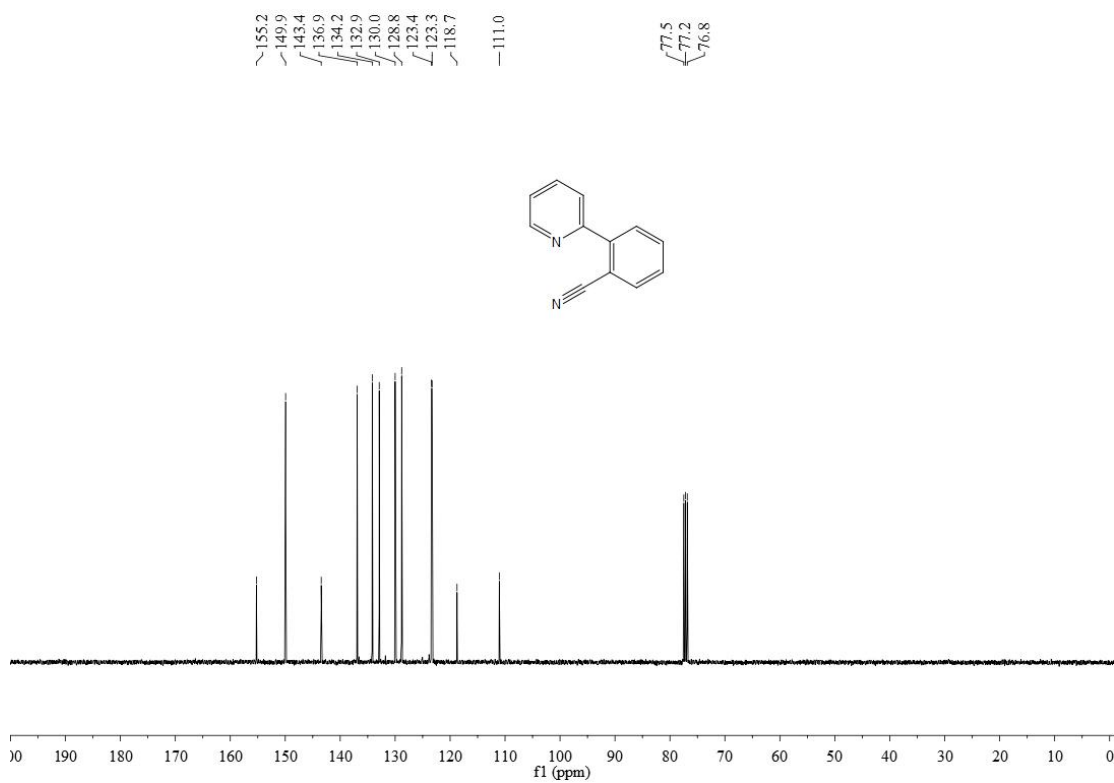

$^1\text{H}$  NMR spectrum of compound **3b**

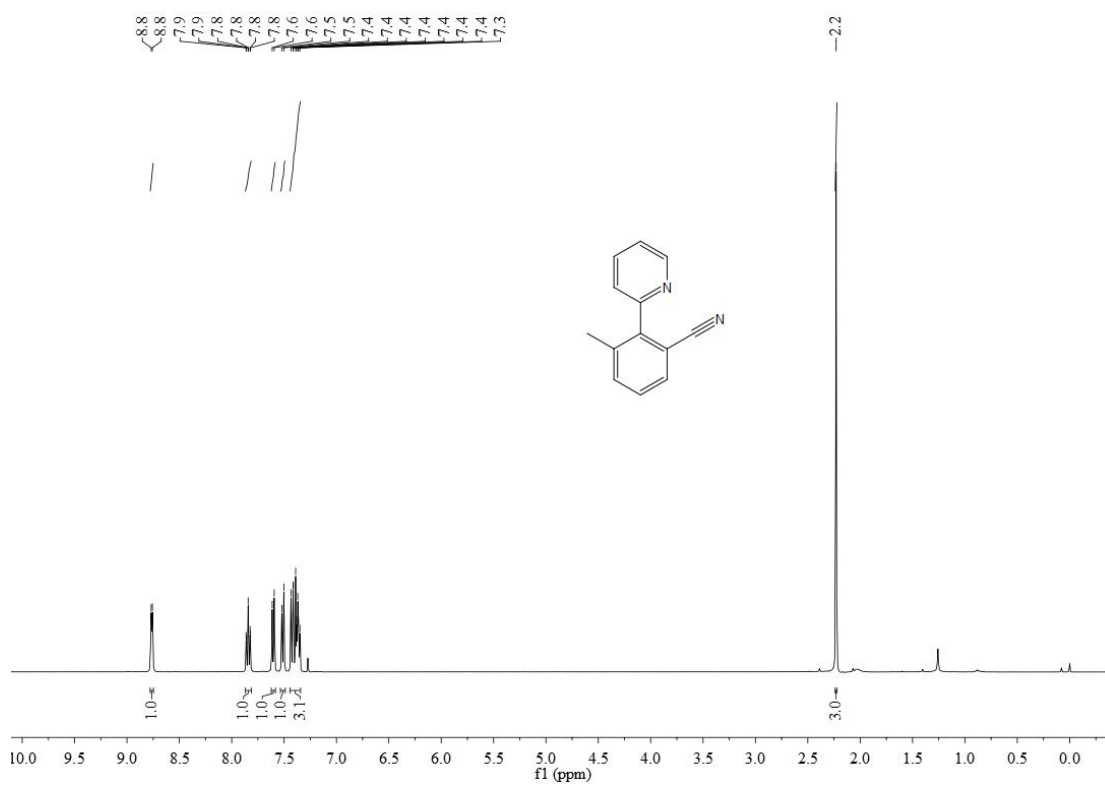

$^{13}\text{C}$  NMR spectrum of compound **3b**

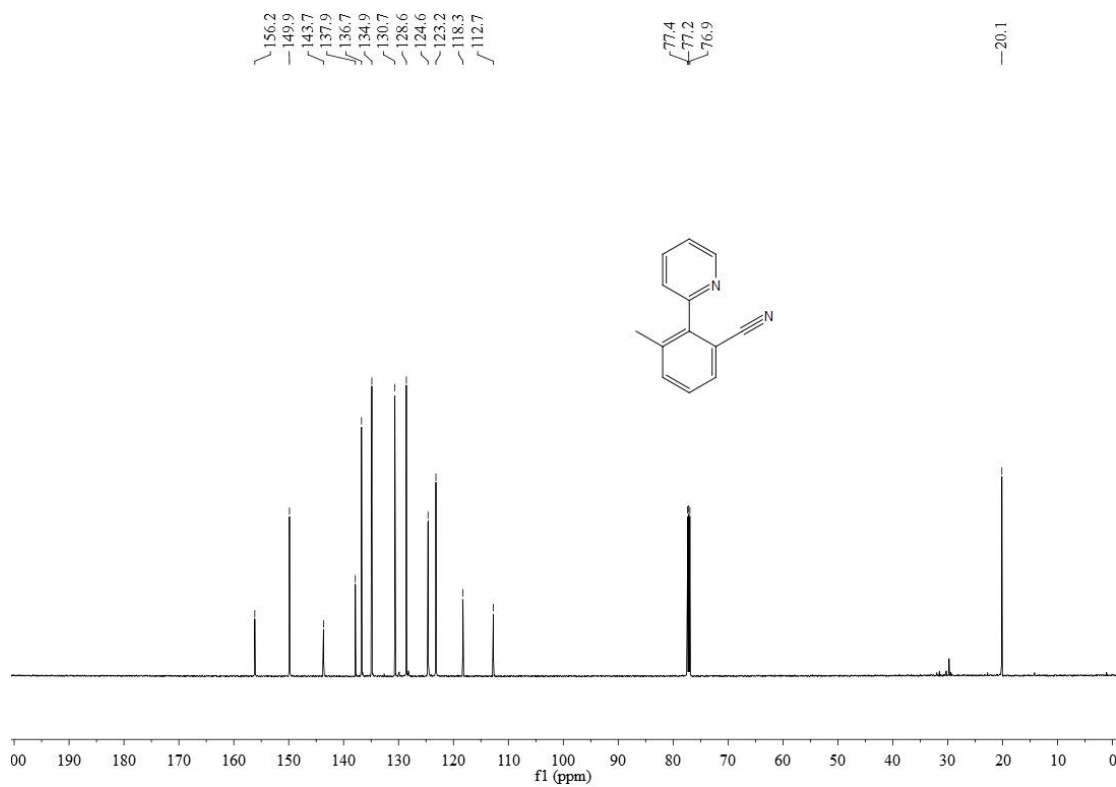

<sup>1</sup>H NMR spectrum of compound **3c**

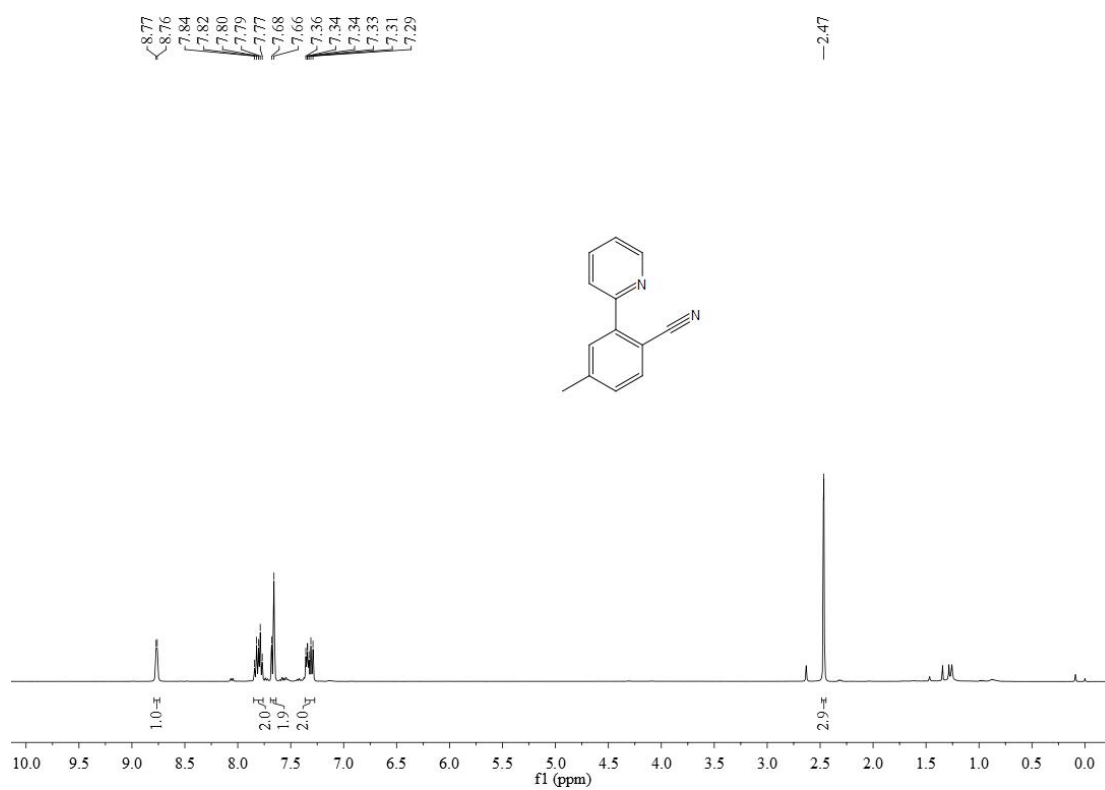

<sup>13</sup>C NMR spectrum of compound **3c**

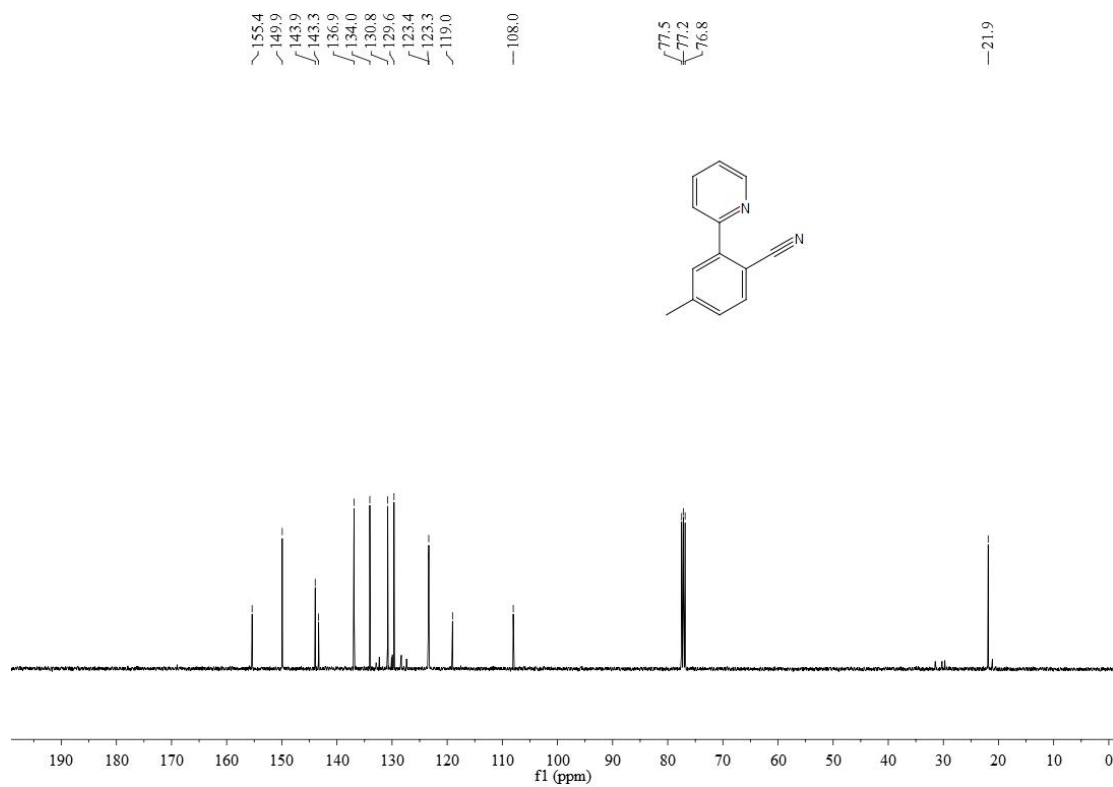

[illegible]

Chemical structure of 4-methyl-2-(pyridin-2-yl)benzonitrile is shown above the spectrum.

Peak list (ppm):

| Peak Label | Chemical Shift (ppm) |
|------------|----------------------|
| 155.2      | 155.2                |
| 149.8      | 149.8                |
| 140.6      | 140.6                |
| 139.2      | 139.2                |
| 136.9      | 136.9                |
| 134.5      | 134.5                |
| 133.8      | 133.8                |
| 129.9      | 129.9                |
| 128.3      | 128.3                |
| 123.2      | 123.2                |
| 118.9      | 118.9                |
| 110.8      | 110.8                |
| 77.5       | 77.5                 |
| 77.2       | 77.2                 |
| 76.8       | 76.8                 |
| 20.9       | 20.9                 |

<sup>1</sup>H NMR spectrum of compound **3e**

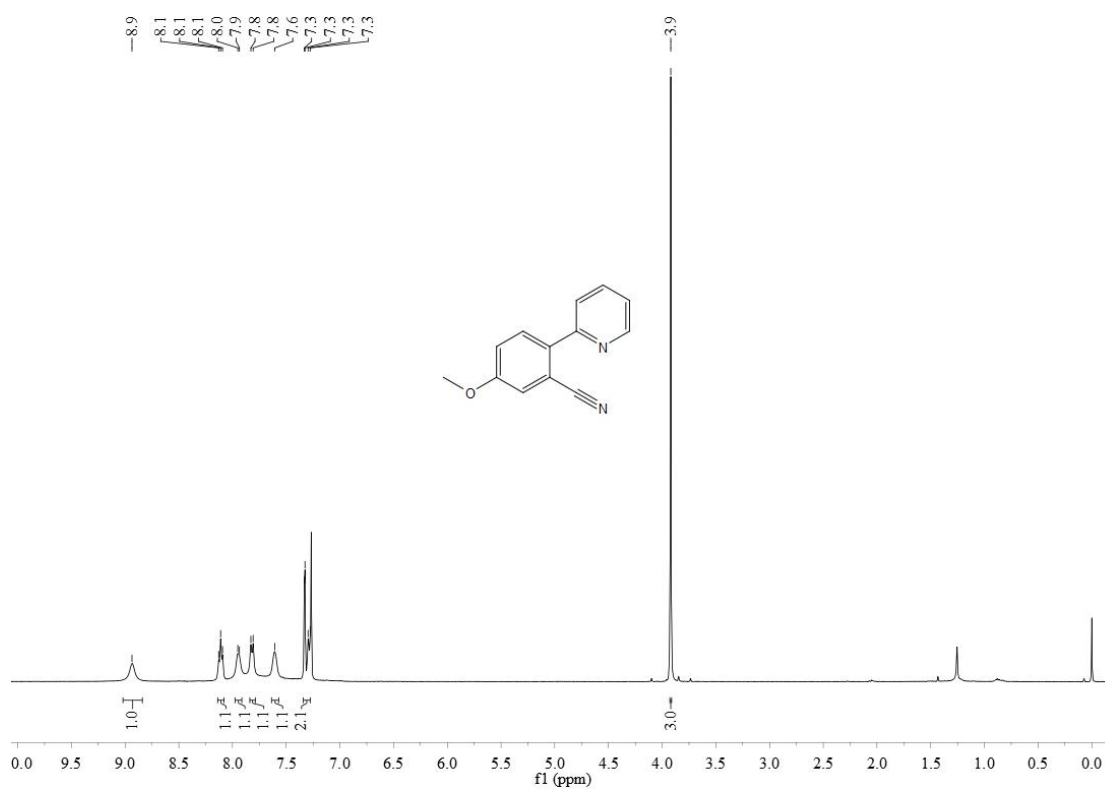

<sup>13</sup>C NMR spectrum of compound **3e**

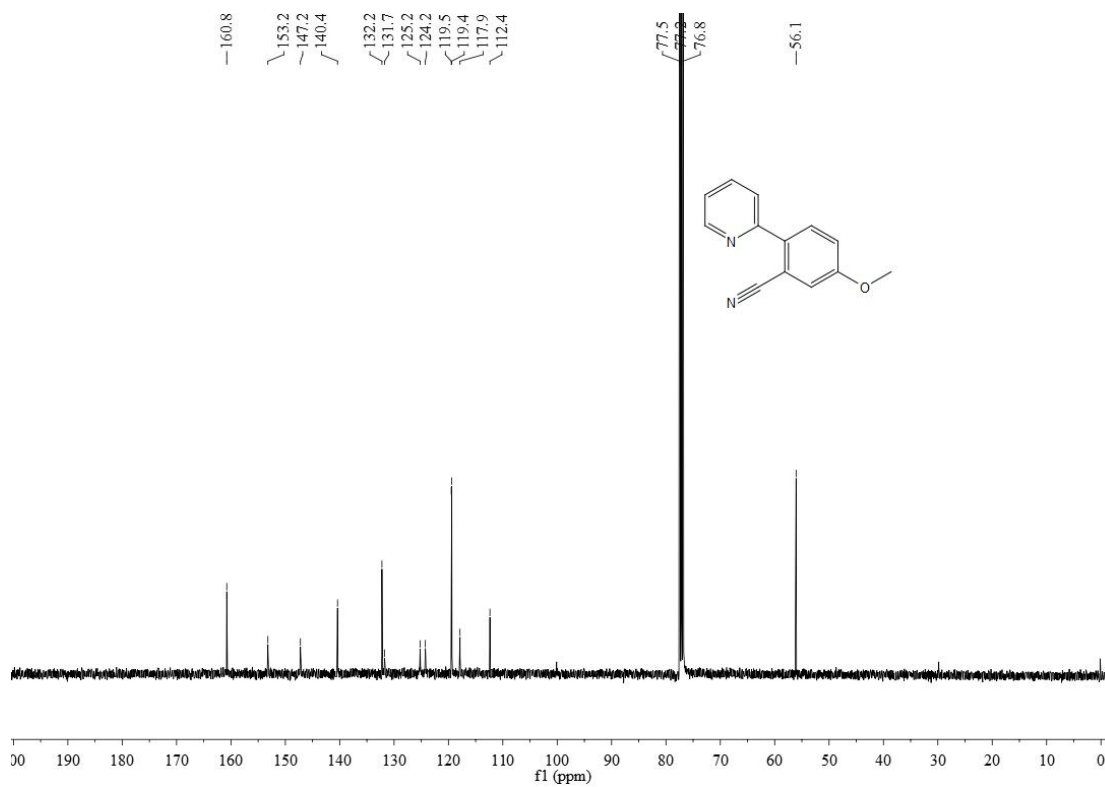

<sup>1</sup>H NMR spectrum of compound **3f**

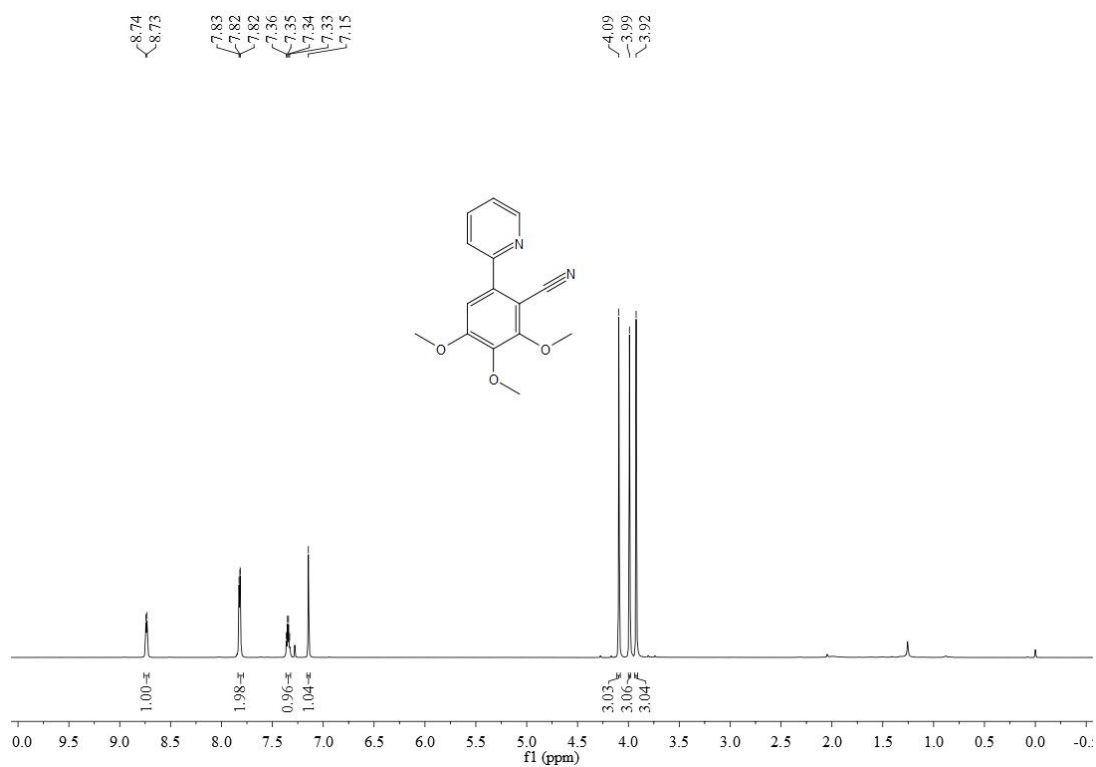

<sup>13</sup>C NMR spectrum of compound **3f**

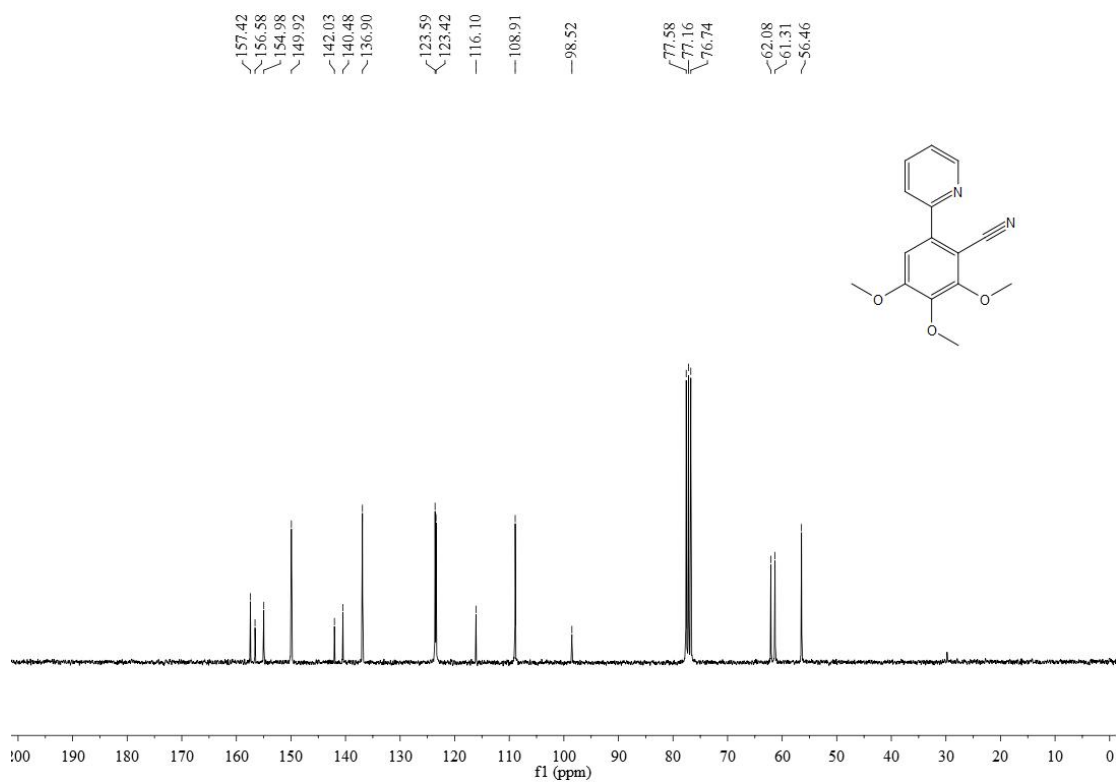



<sup>1</sup>H NMR spectrum of compound **3g**

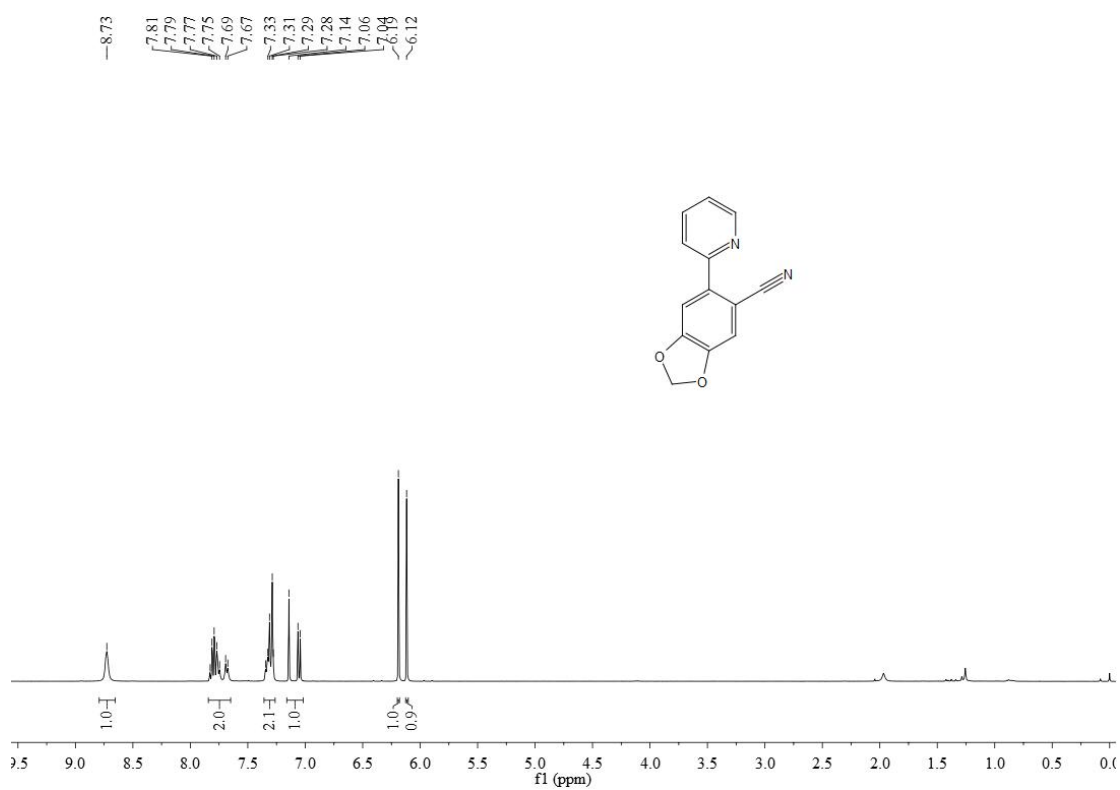

<sup>13</sup>C NMR spectrum of compound **3g**

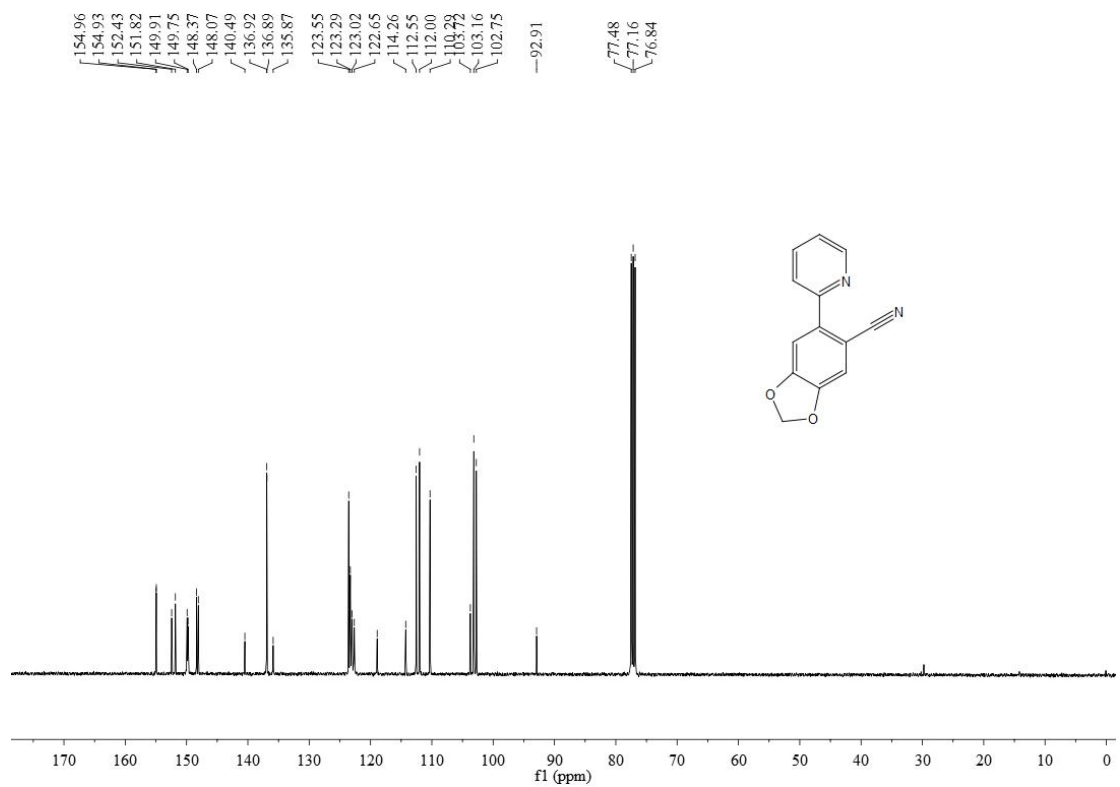

<sup>1</sup>H NMR spectrum of compound **3h**

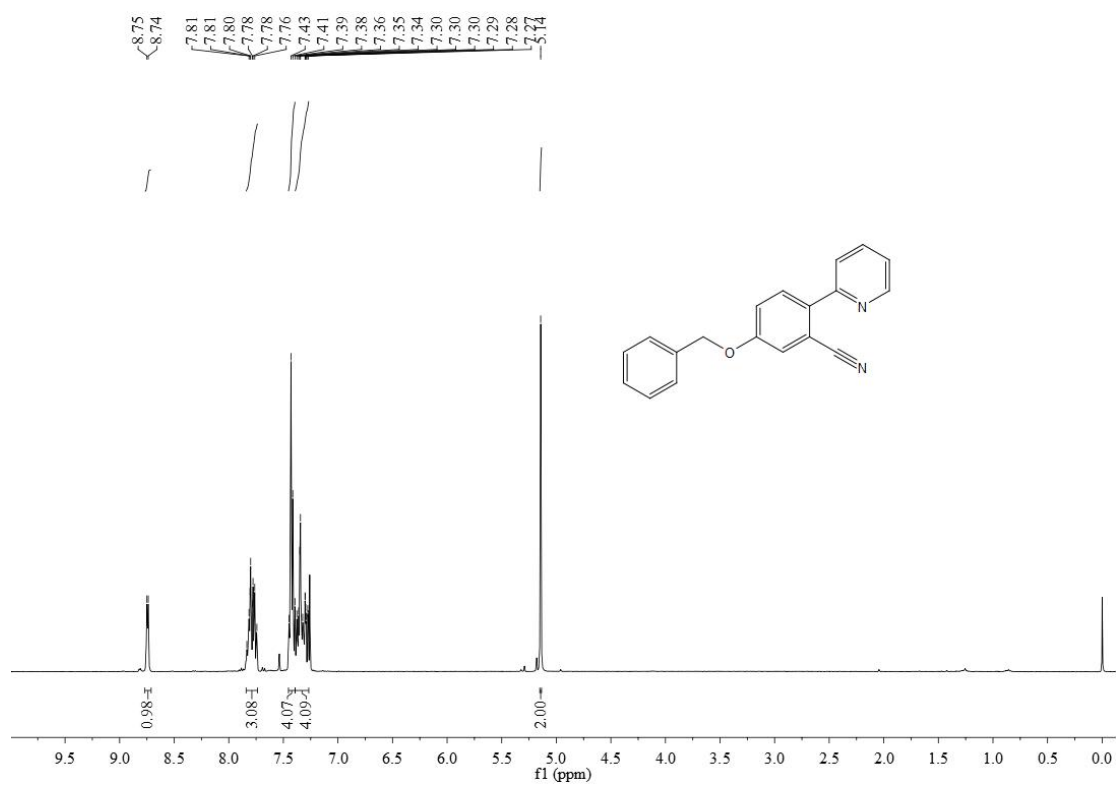

<sup>13</sup>C NMR spectrum of compound **3h**

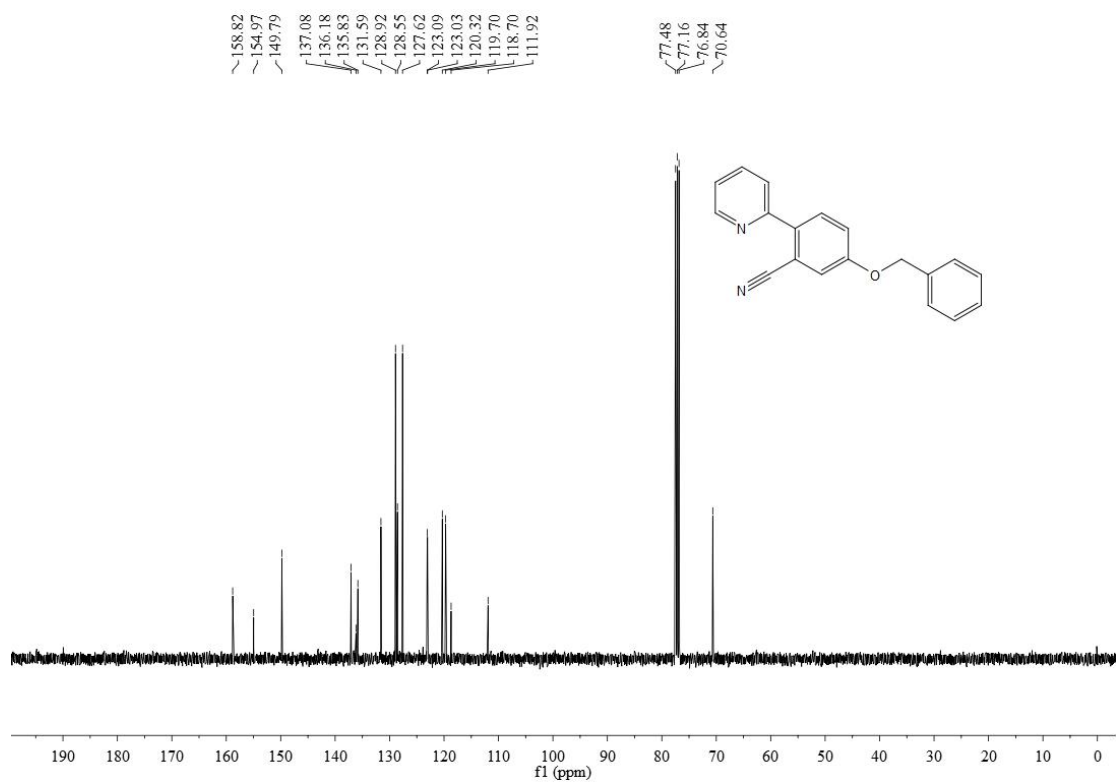

<sup>1</sup>H NMR spectrum of compound **3i**

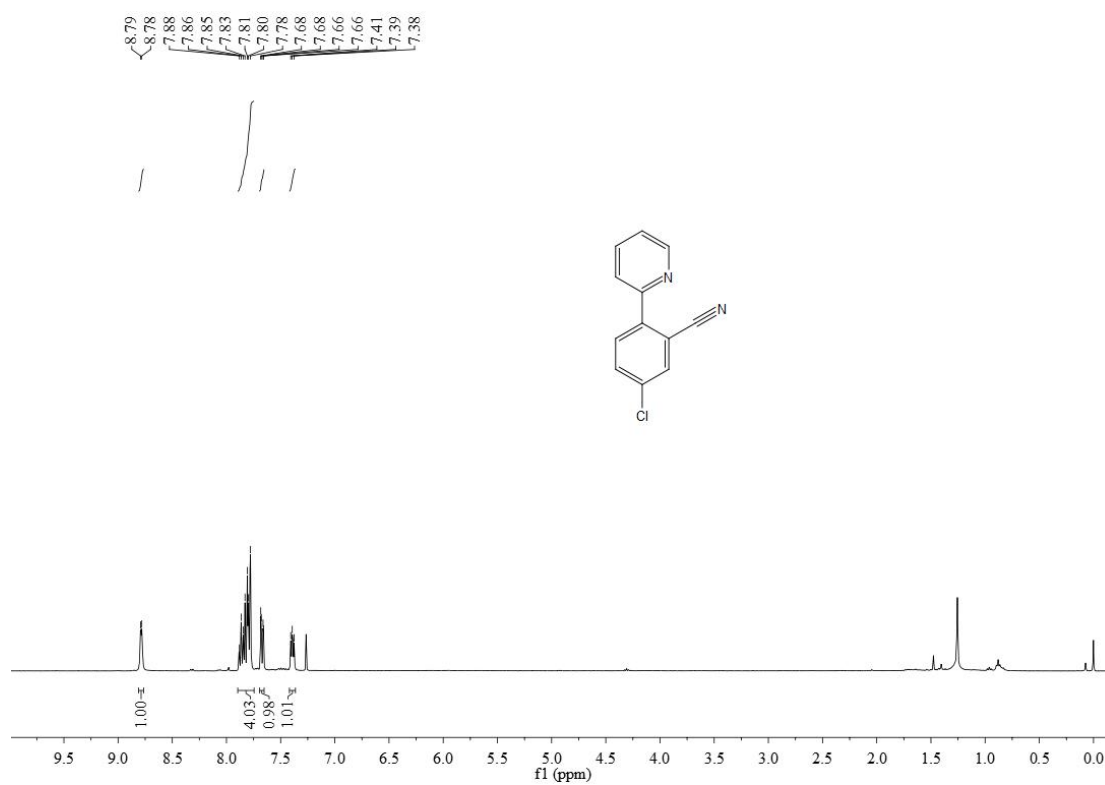

<sup>13</sup>C NMR spectrum of compound **3i**

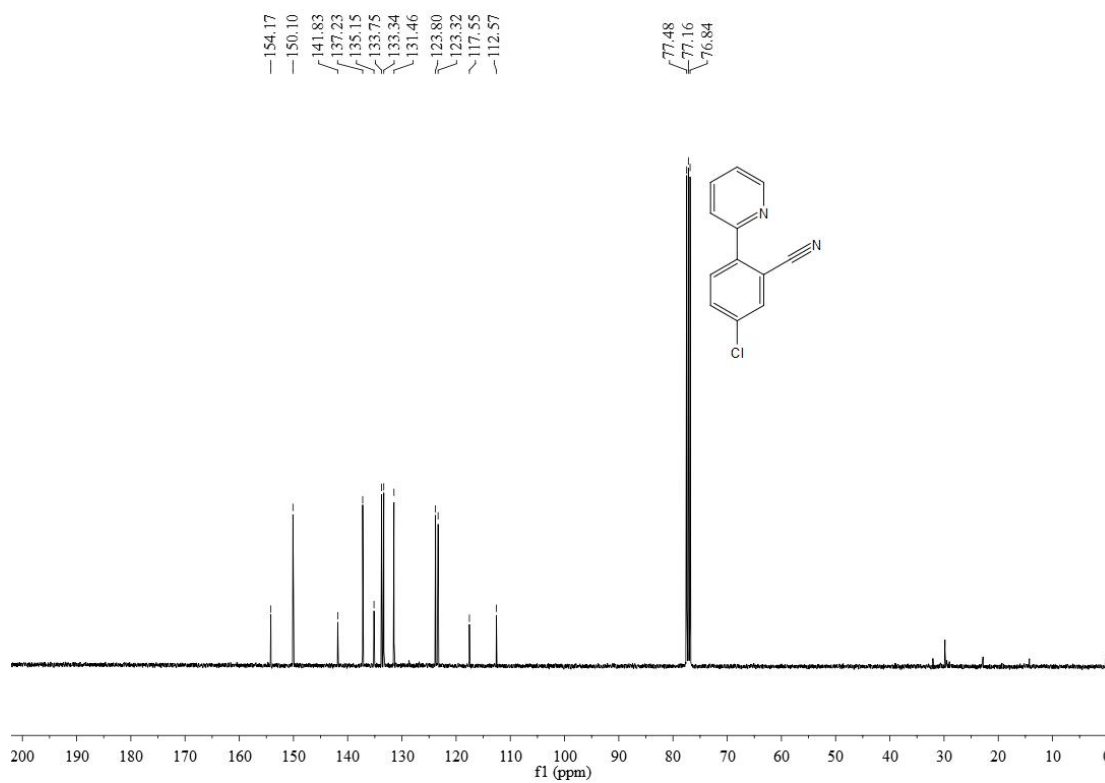

<sup>1</sup>H NMR spectrum of compound **3j**

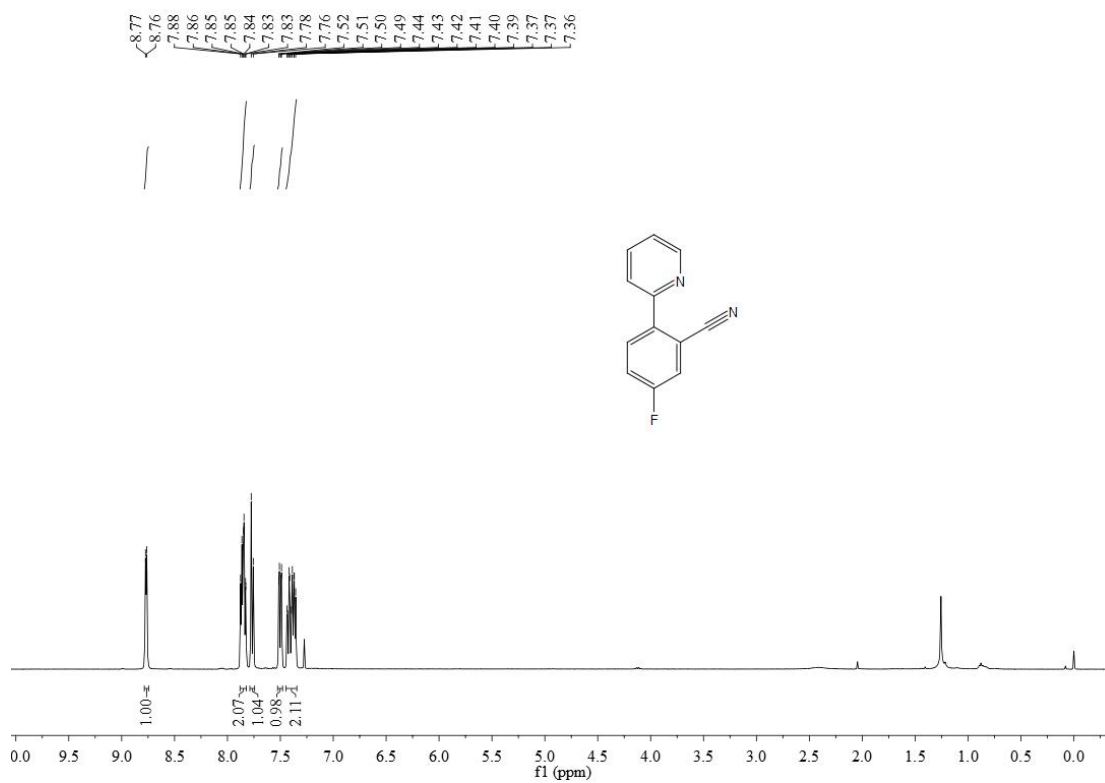

<sup>13</sup>C NMR spectrum of compound **3j**

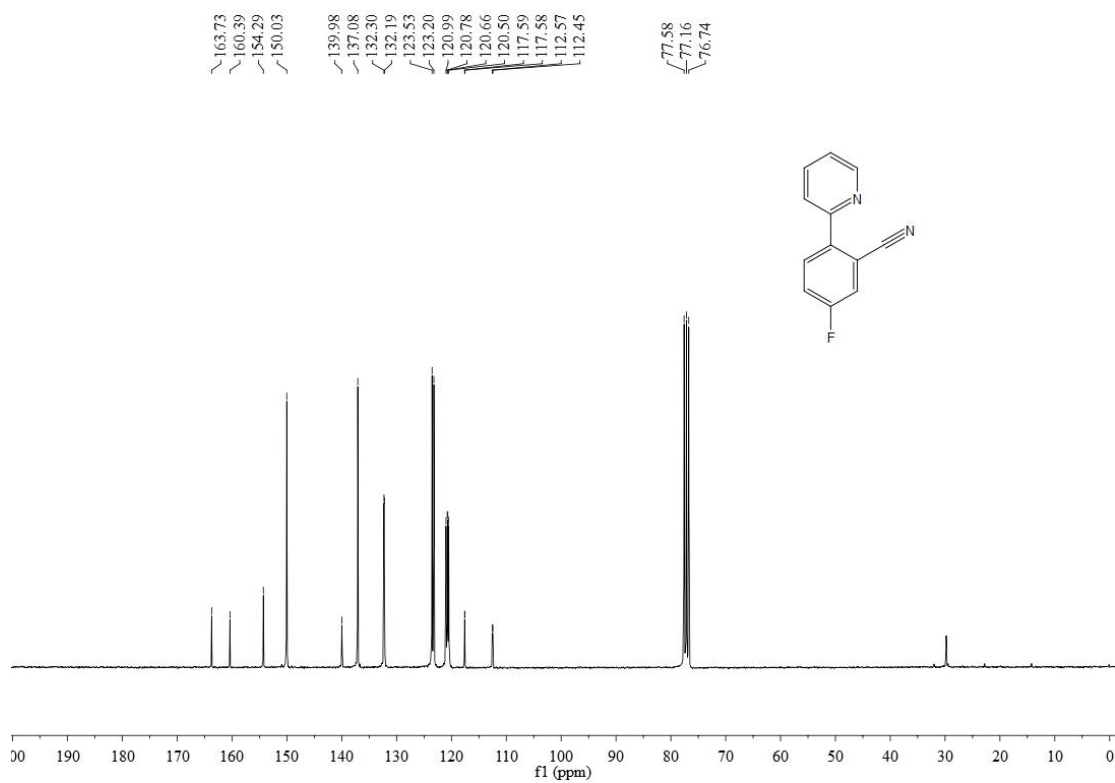

<sup>1</sup>H NMR spectrum of compound **3k**

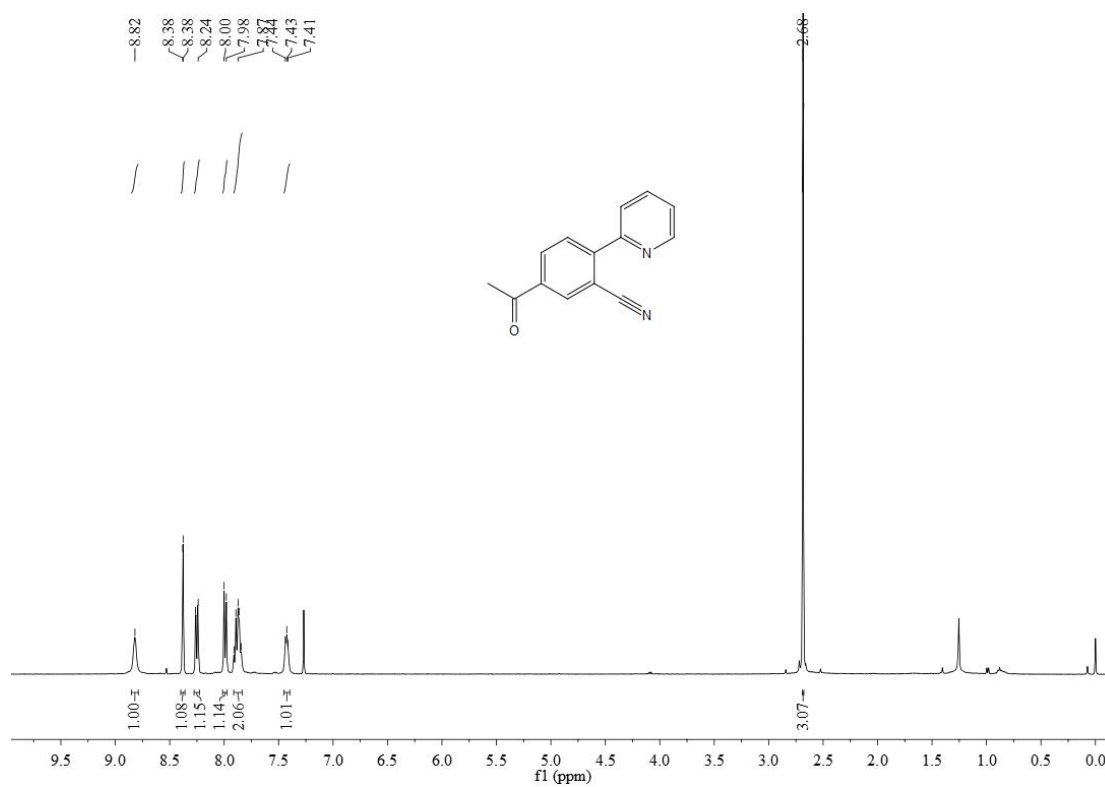

<sup>13</sup>C NMR spectrum of compound **3k**

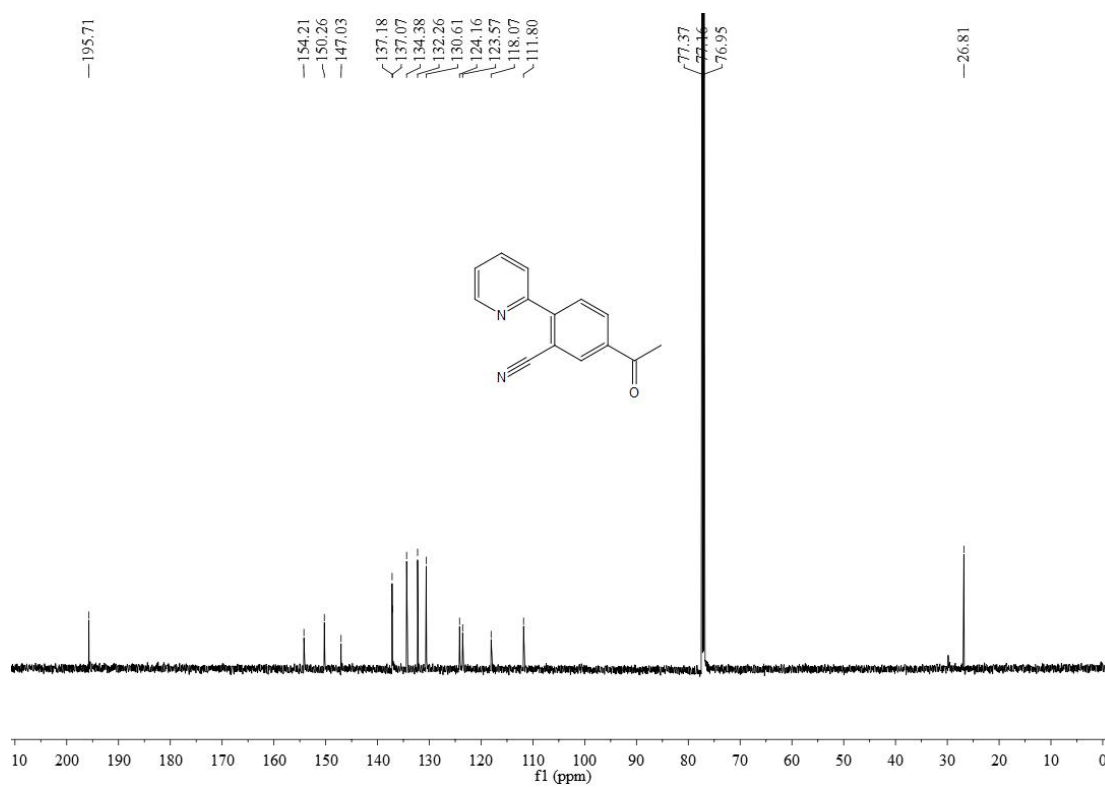

<sup>1</sup>H NMR spectrum of compound **31**

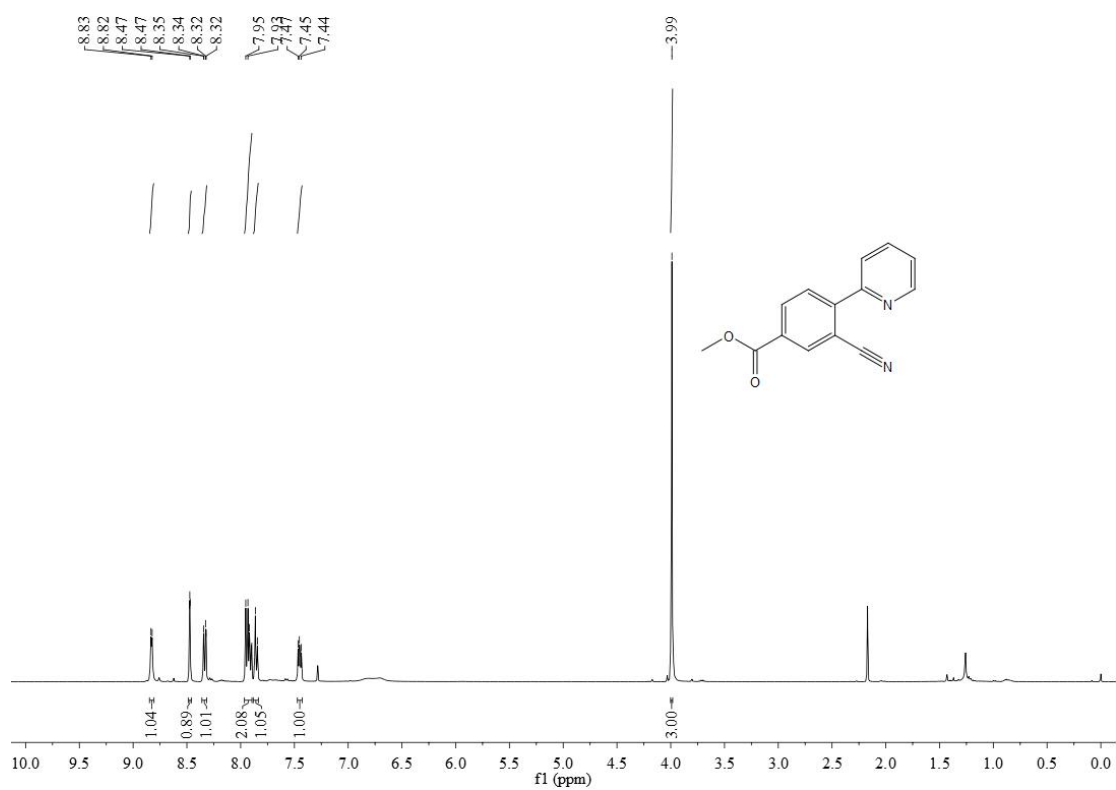

<sup>13</sup>C NMR spectrum of compound **31**

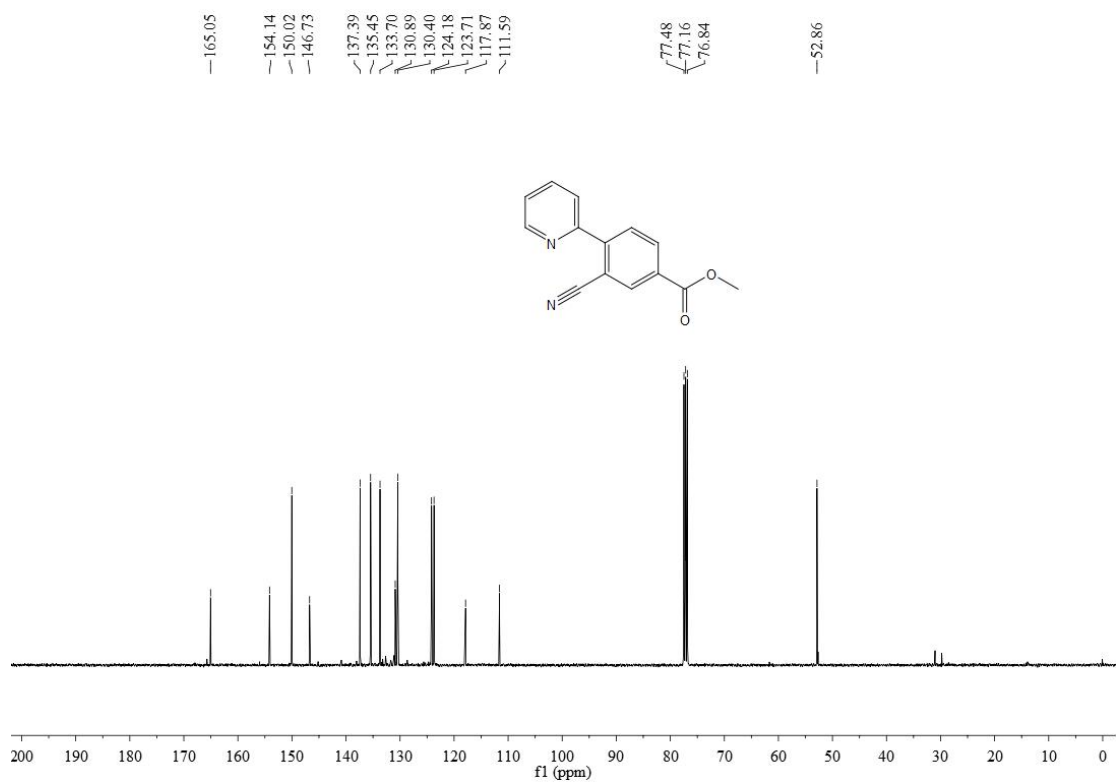

$^1\text{H}$  NMR spectrum of compound **3m**

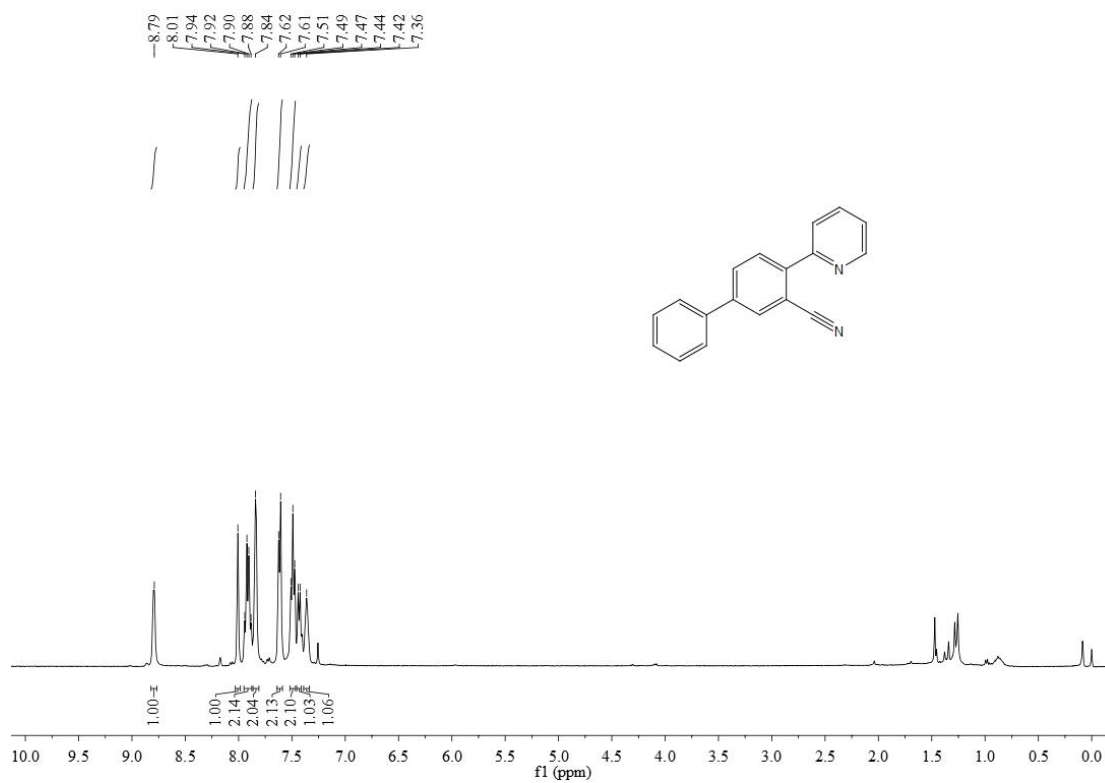

$^{13}\text{C}$  NMR spectrum of compound **3m**

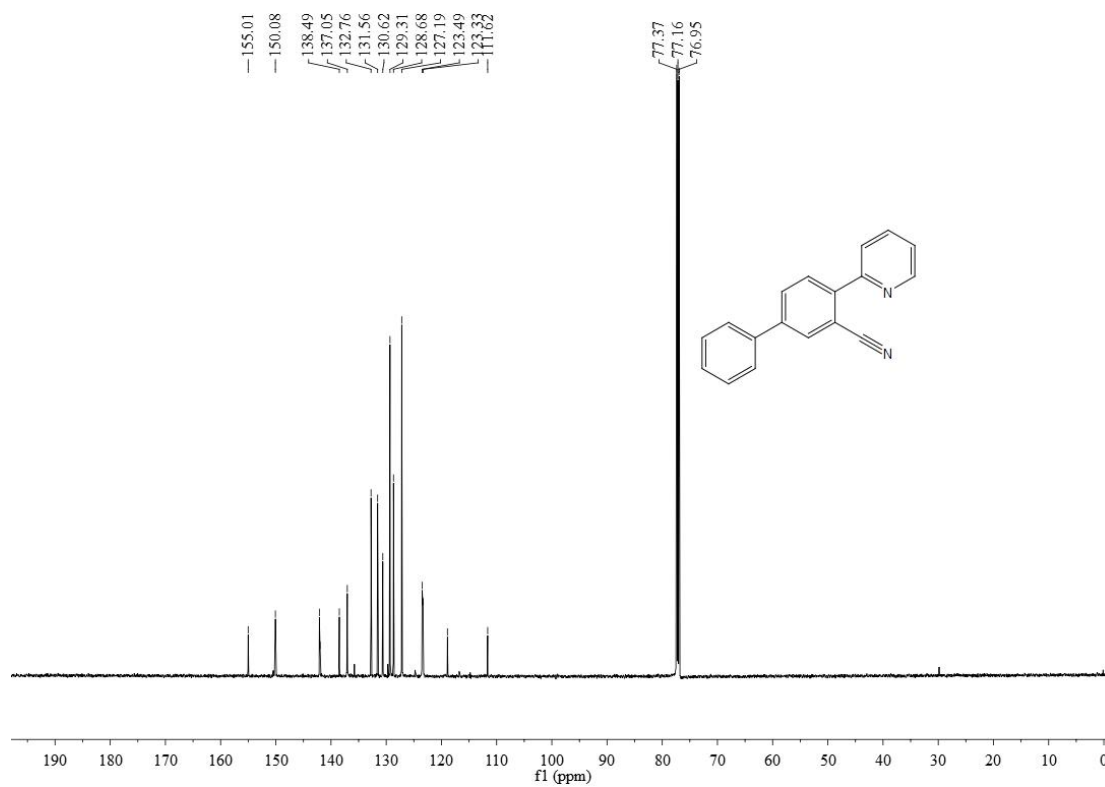

<sup>1</sup>H NMR spectrum of compound **3n**

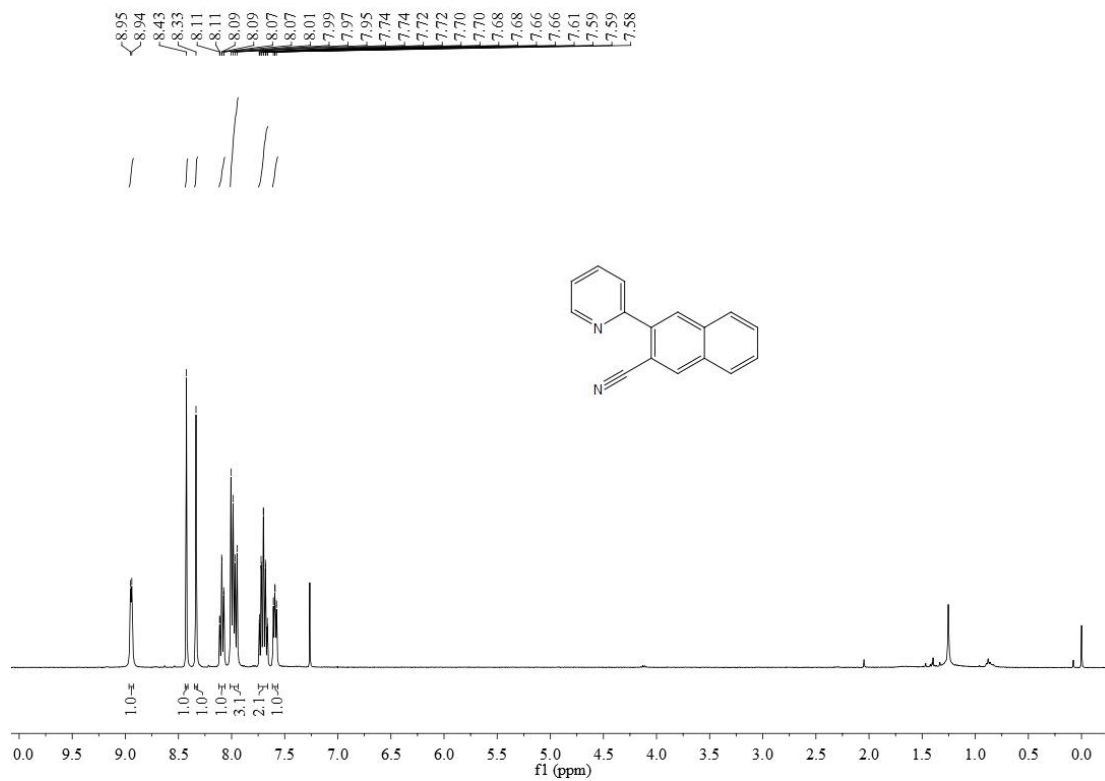

<sup>13</sup>C NMR spectrum of compound **3n**

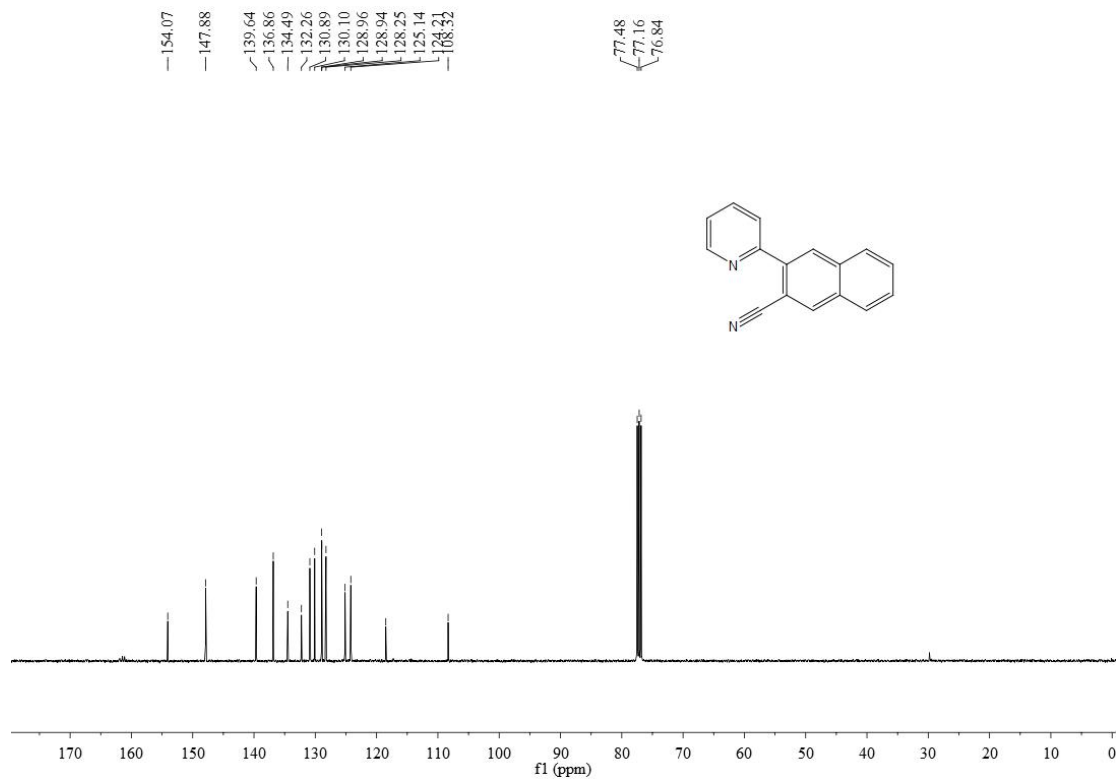



$^1\text{H}$  NMR spectrum of compound **3o**

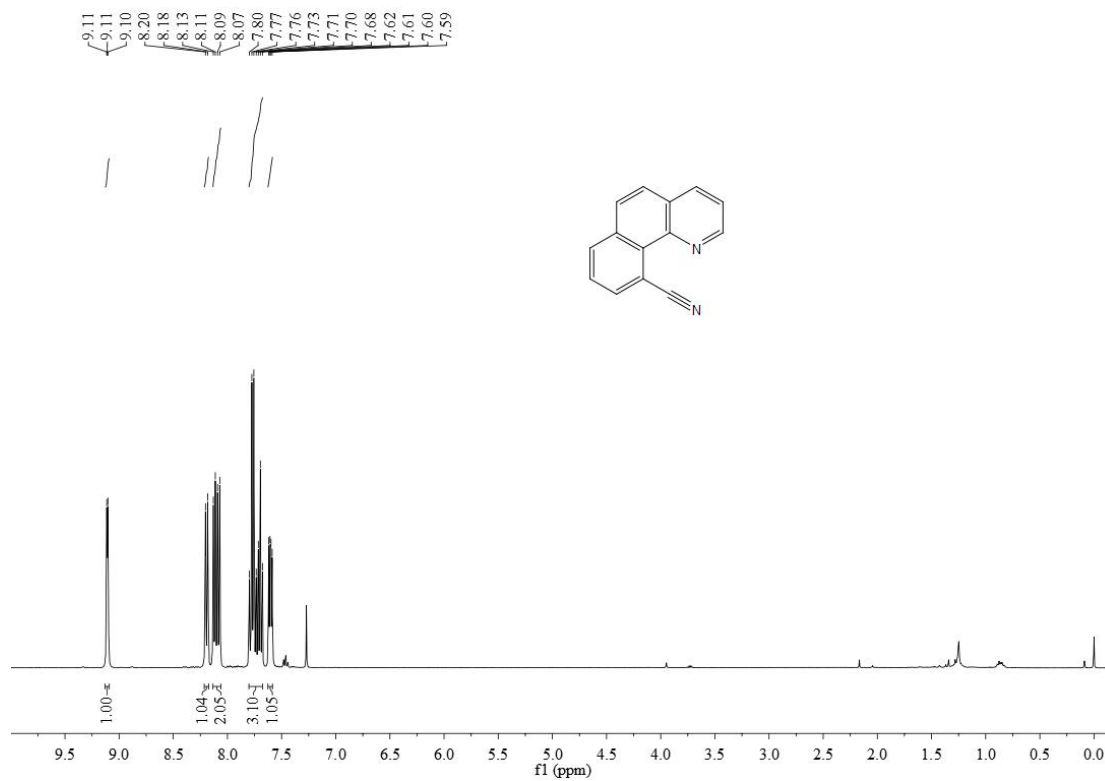

$^{13}\text{C}$  NMR spectrum of compound **3o**

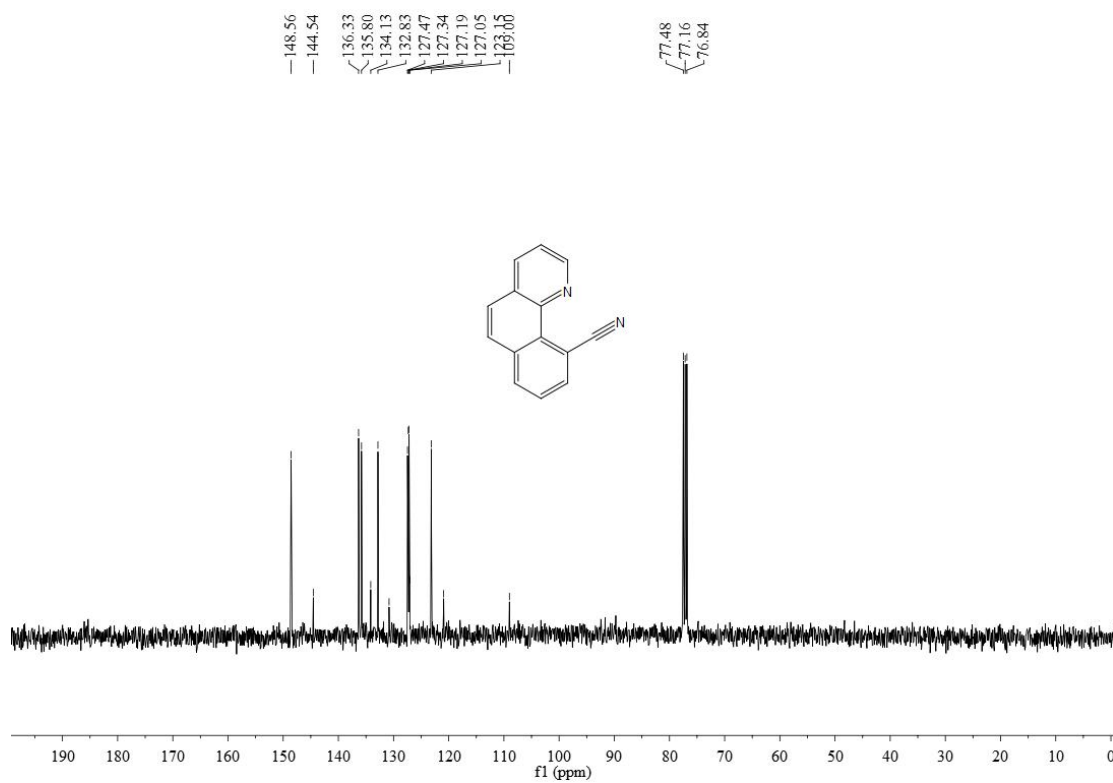

$^1\text{H}$  NMR spectrum of compound **3p**

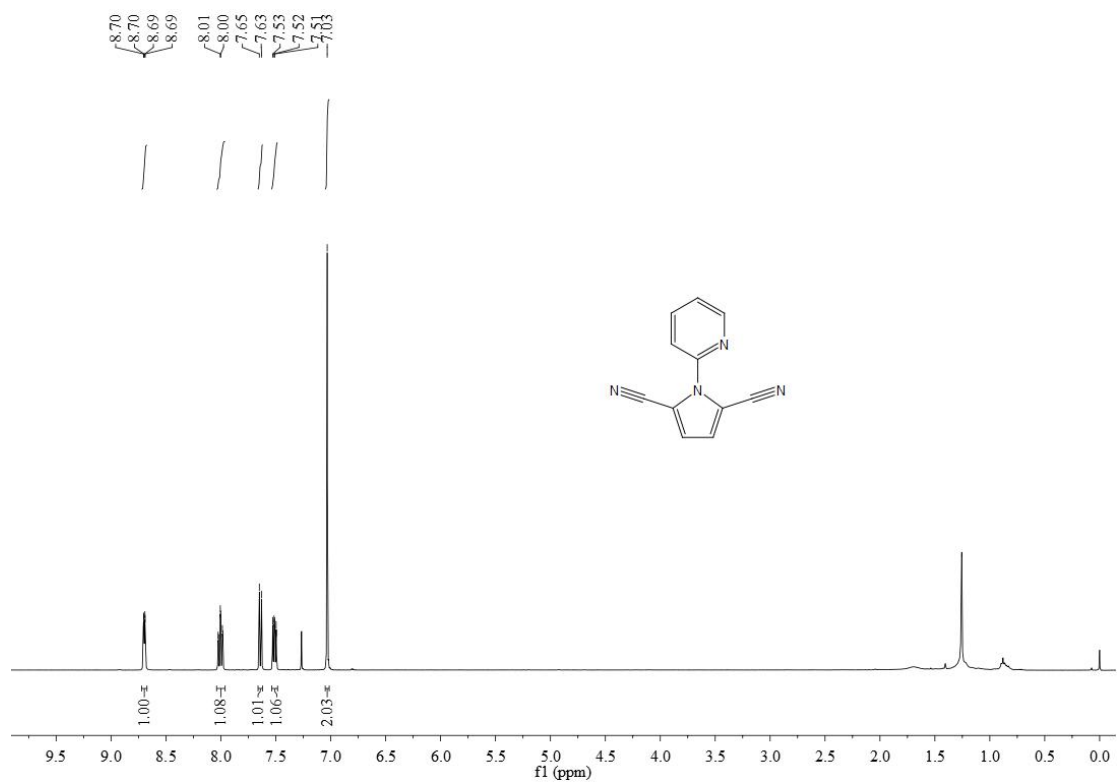

$^{13}\text{C}$  NMR spectrum of compound **3p**

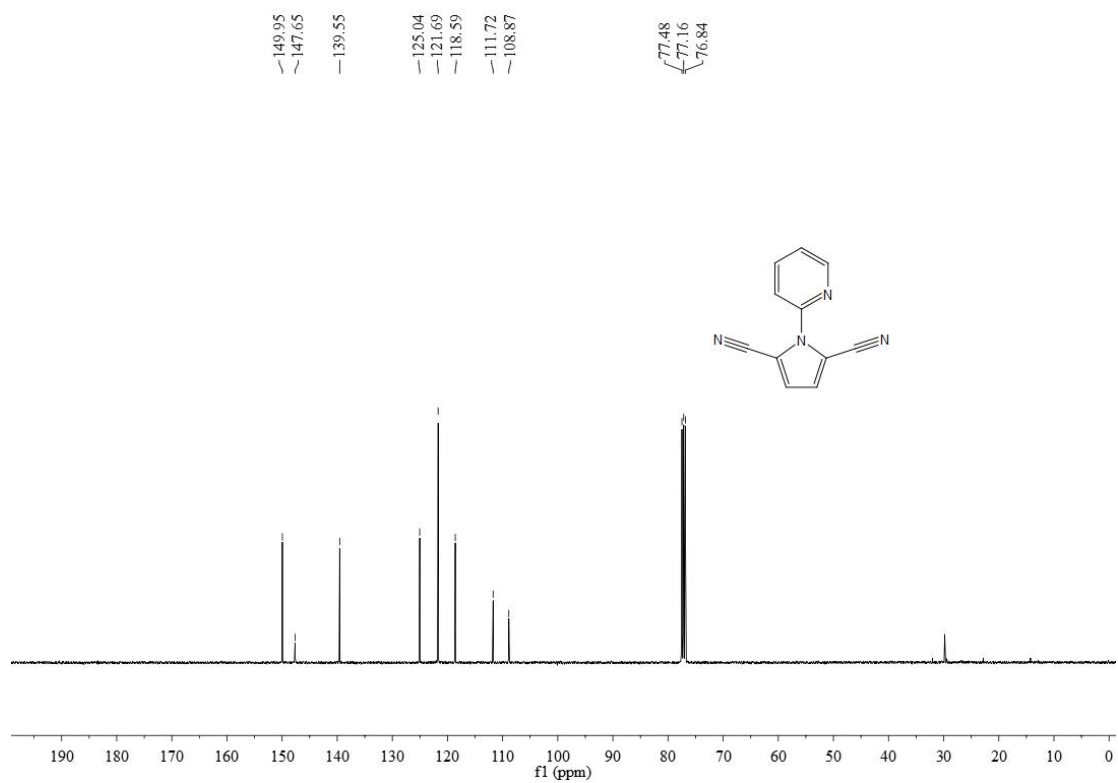

<sup>1</sup>H NMR spectrum of compound **5a**

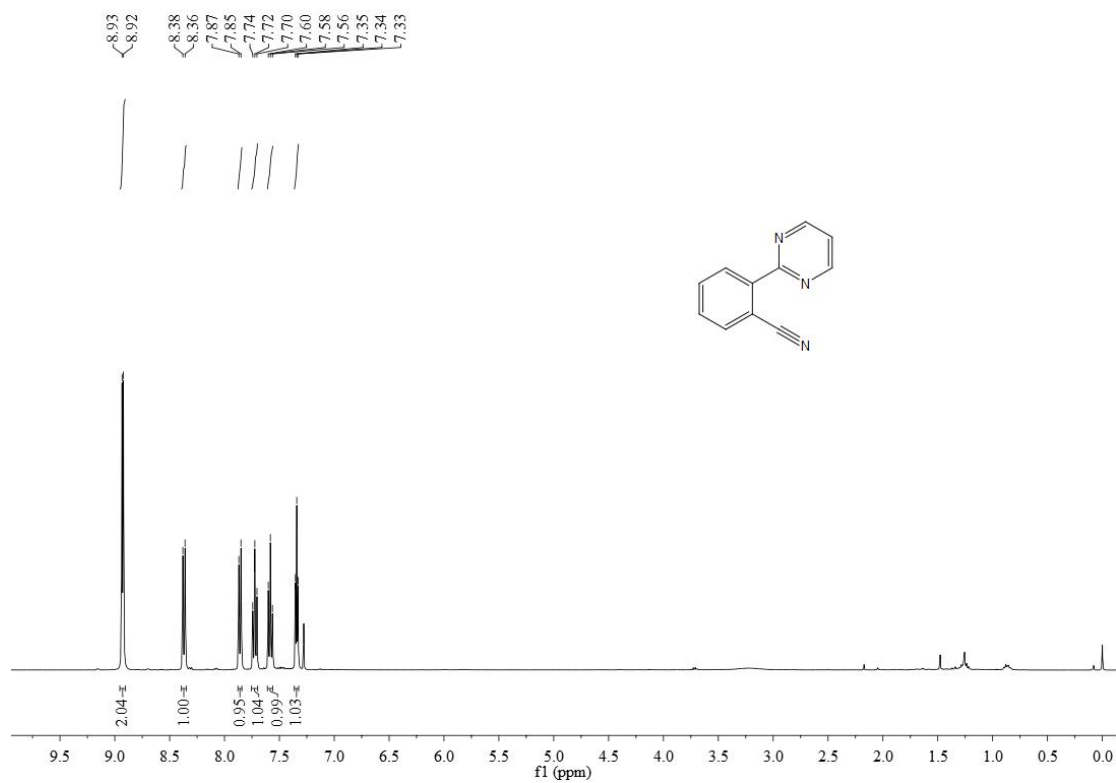

<sup>13</sup>C NMR spectrum of compound **5a**

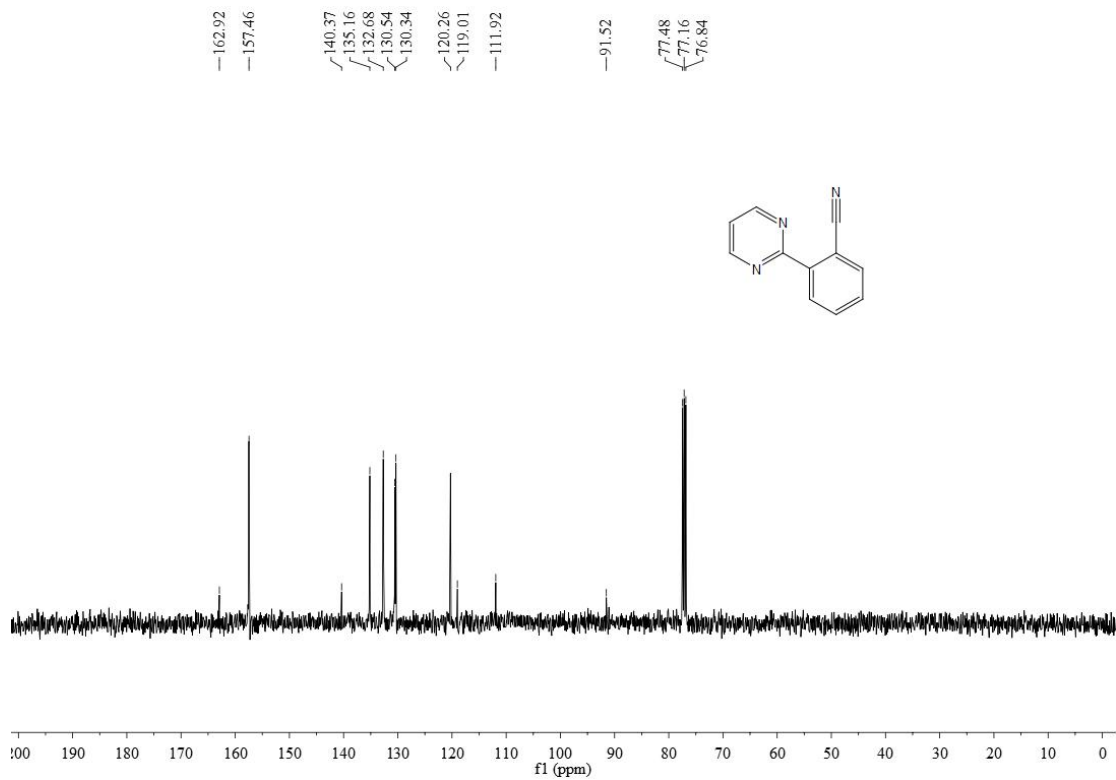

<sup>1</sup>H NMR spectrum of compound **5b**

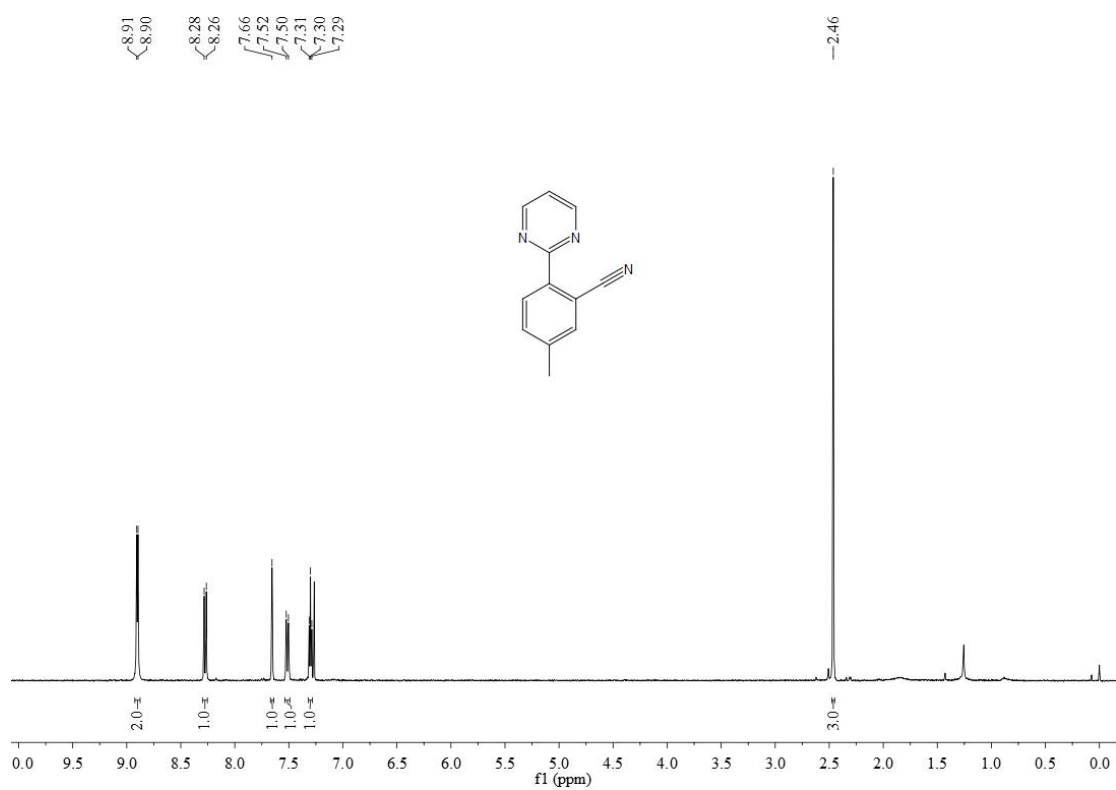

<sup>13</sup>C NMR spectrum of compound **5b**

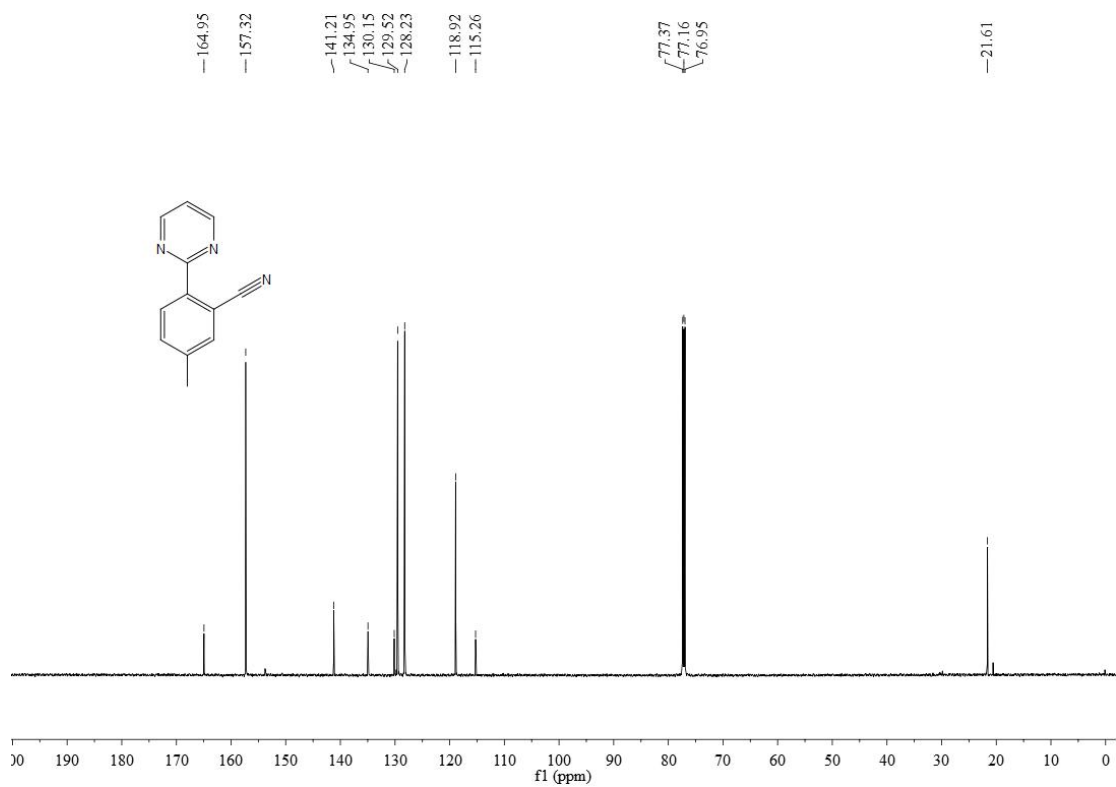

<sup>1</sup>H NMR spectrum of compound **5c**

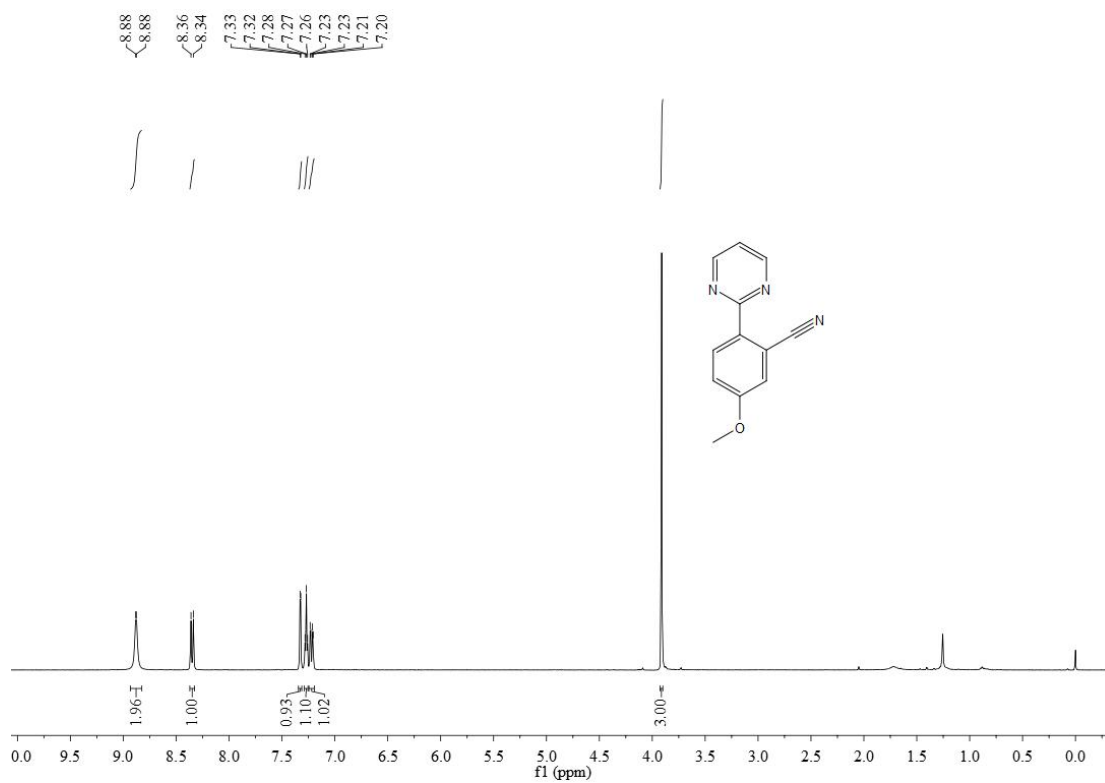

<sup>13</sup>C NMR spectrum of compound **5c**

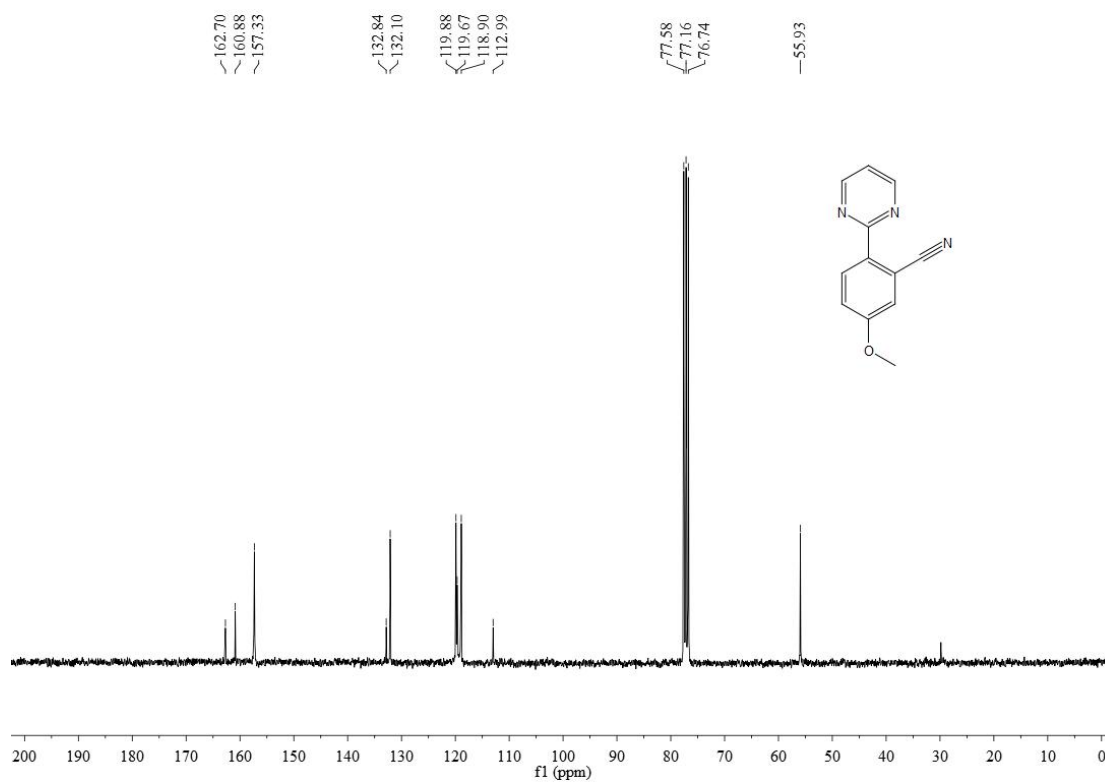

<sup>1</sup>H NMR spectrum of compound **5d**

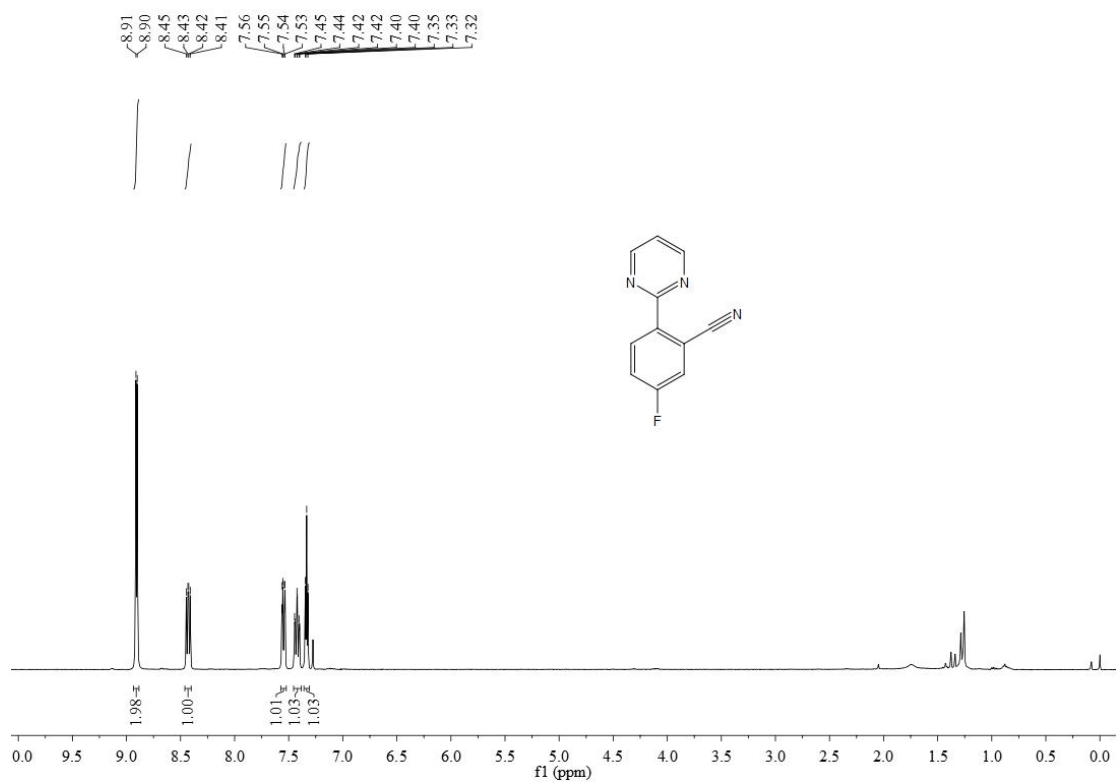

<sup>13</sup>C NMR spectrum of compound **5d**

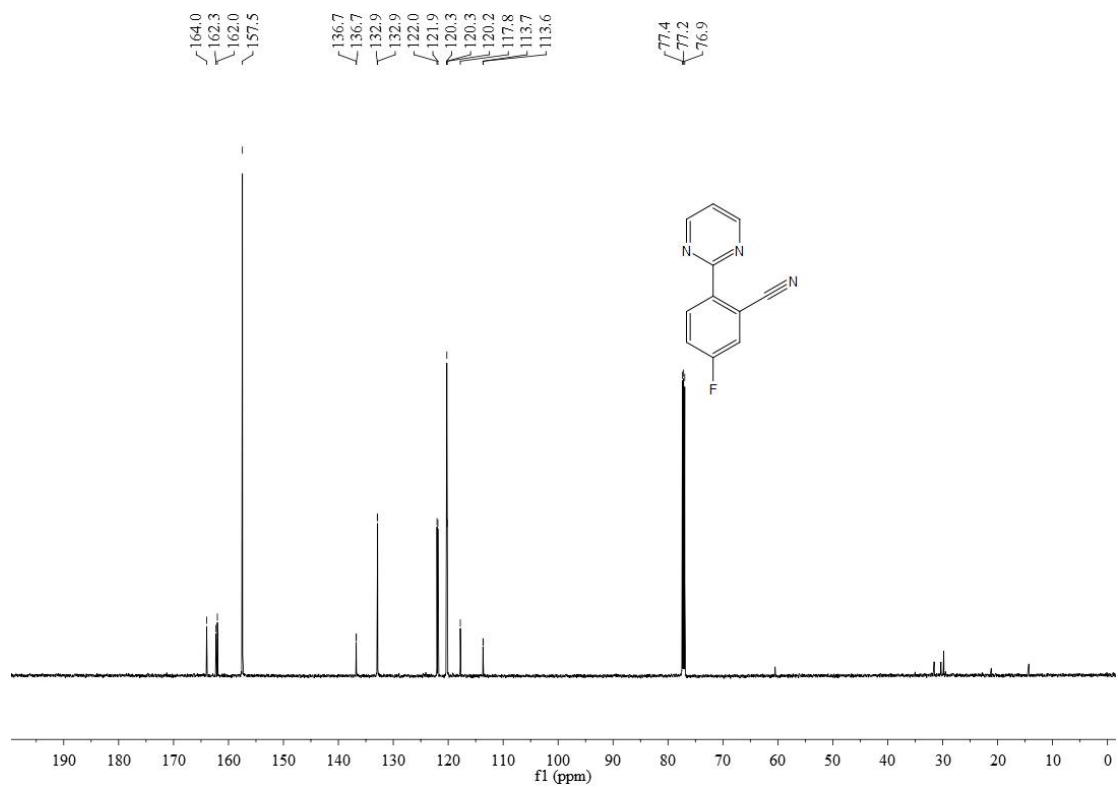

$^1\text{H}$  NMR spectrum of compound **5e**

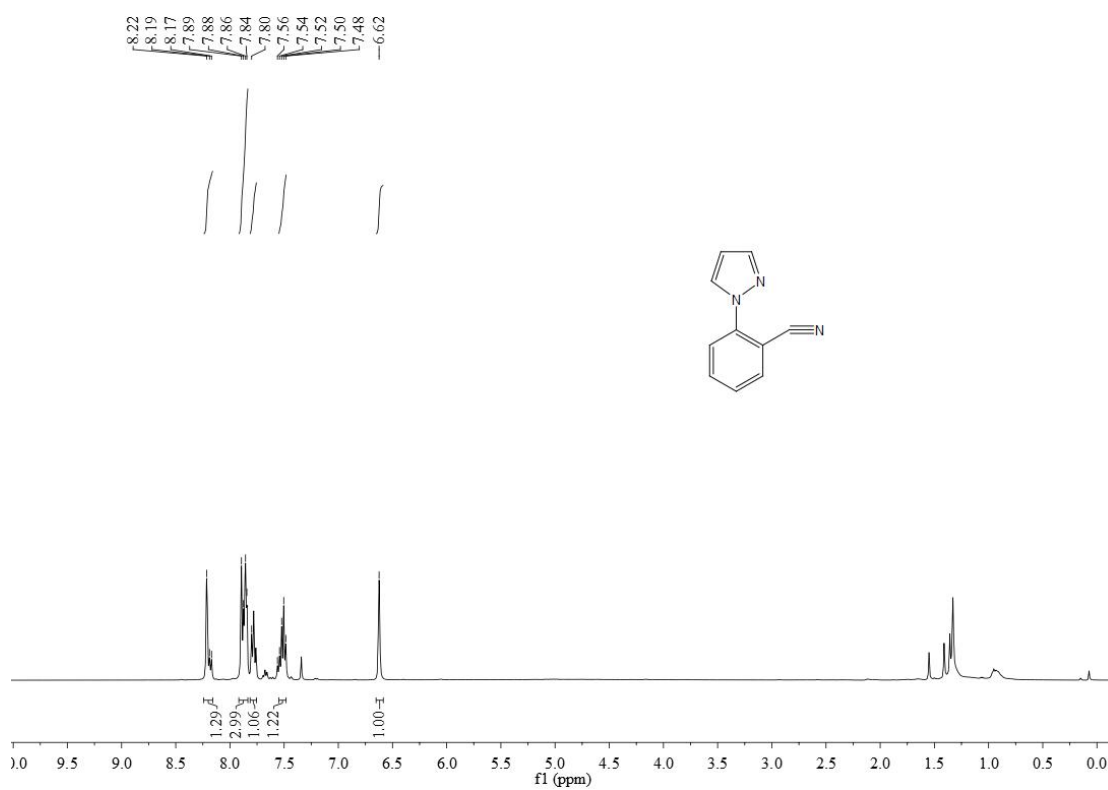

$^{13}\text{C}$  NMR spectrum of compound **5e**

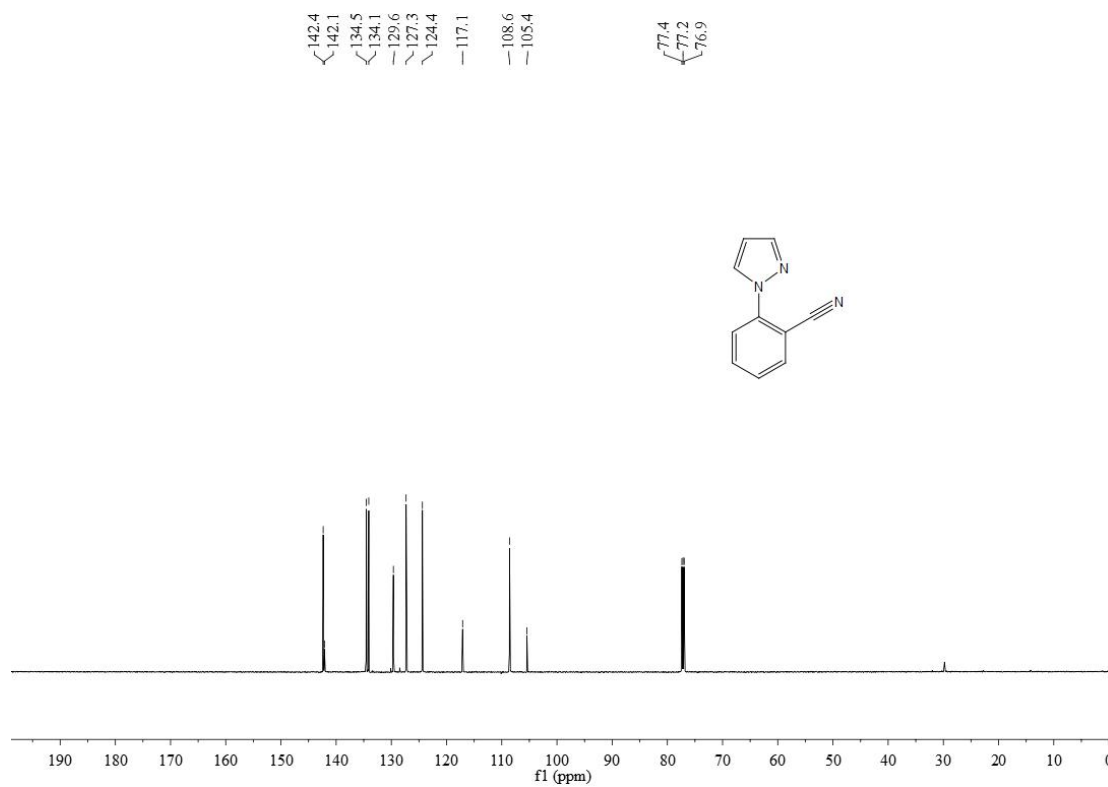

$^1\text{H}$  NMR spectrum of compound **5f**

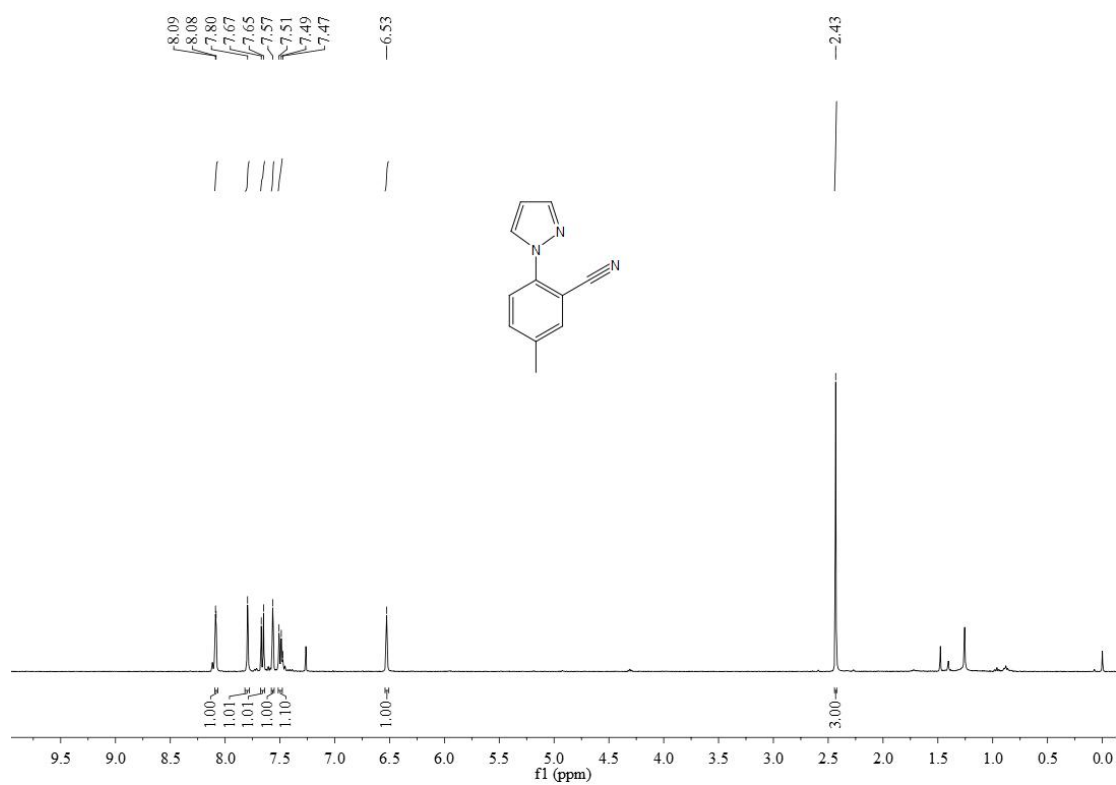

$^{13}\text{C}$  NMR spectrum of compound **5f**

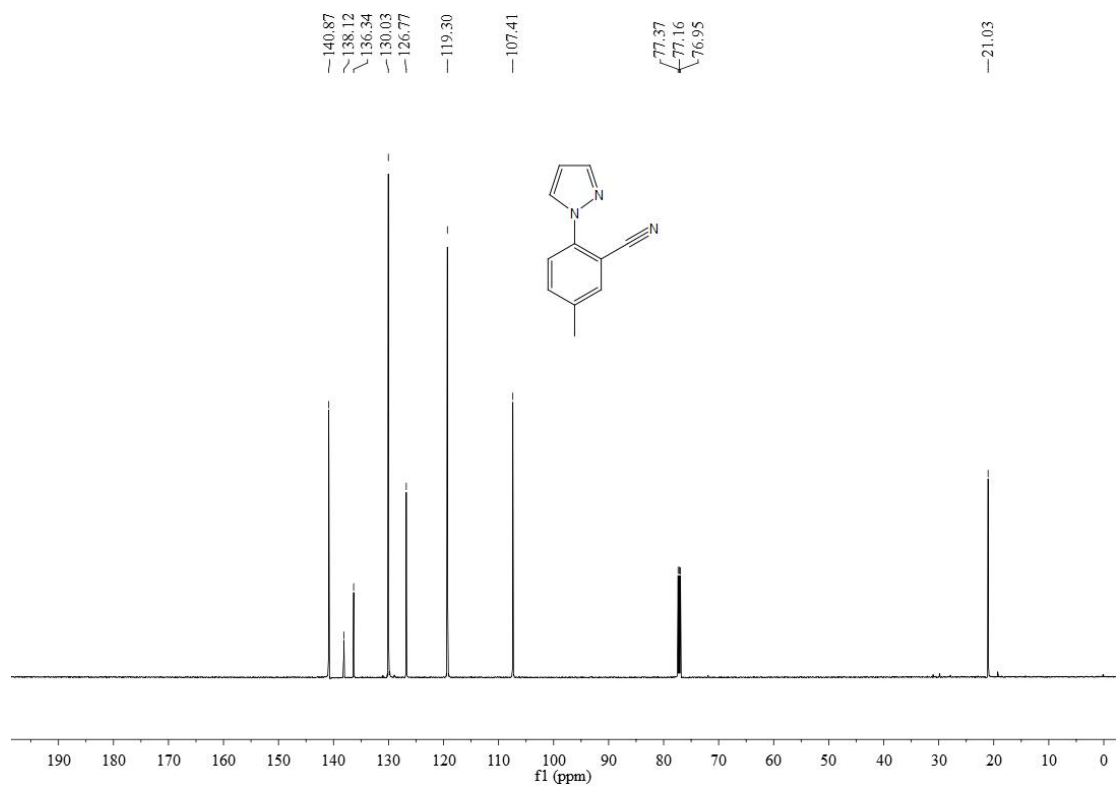



<sup>1</sup>H NMR spectrum of compound **5g**

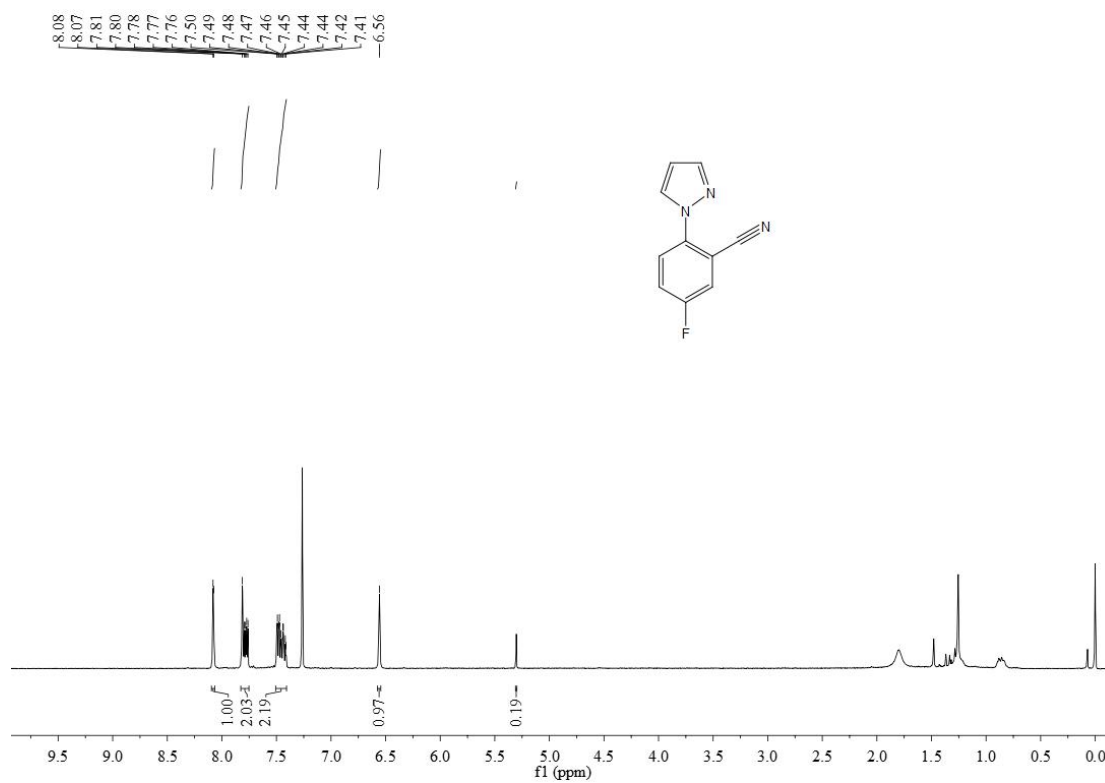

<sup>13</sup>C NMR spectrum of compound **5g**

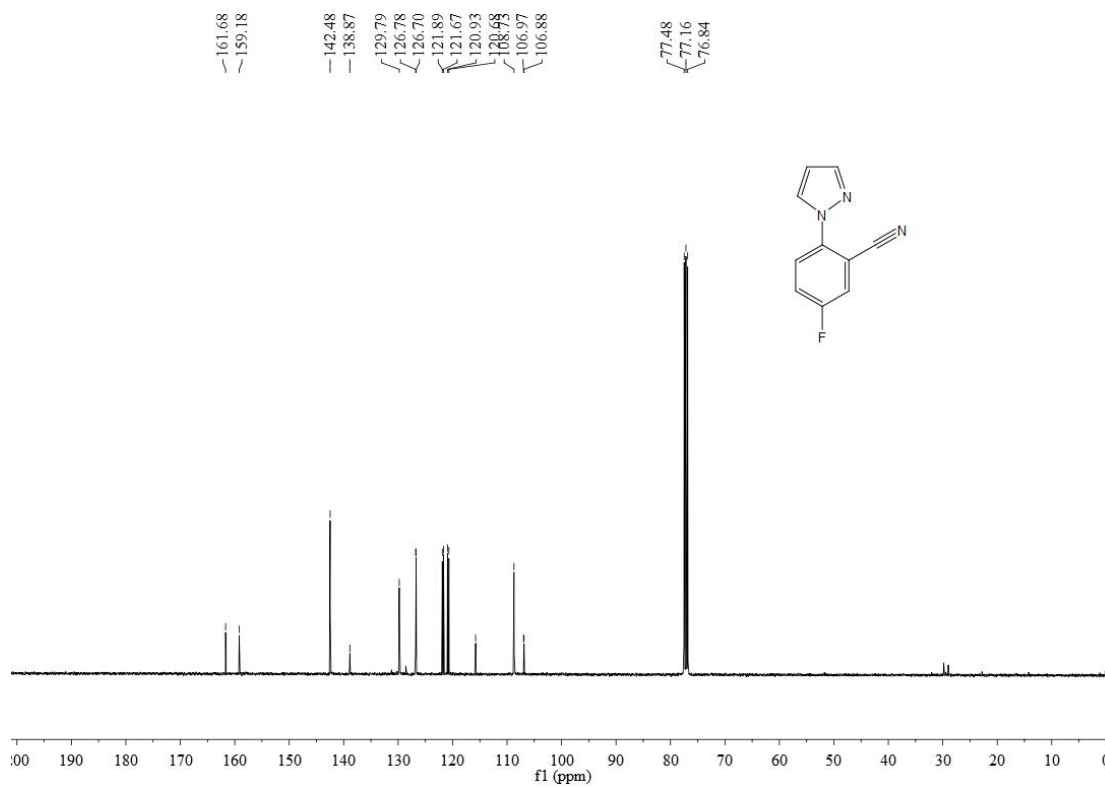

<sup>1</sup>H NMR spectrum of compound **5h**

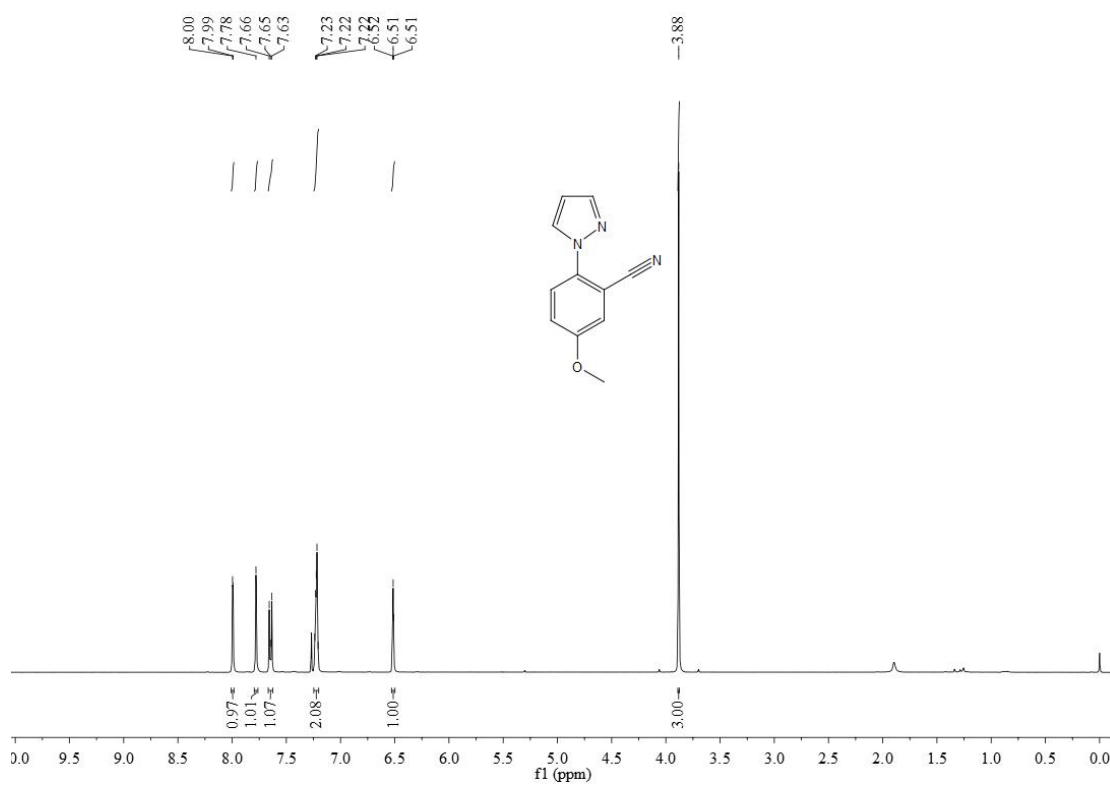

<sup>13</sup>C NMR spectrum of compound **5h**

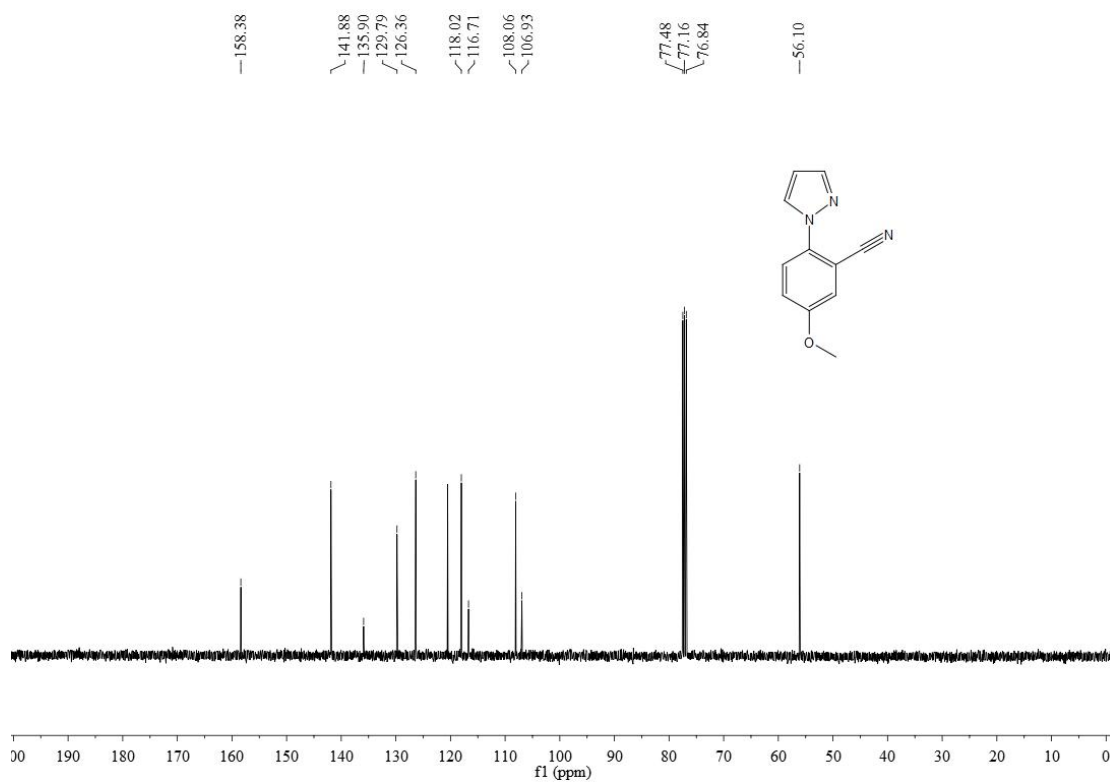

Supplement: c6ra14512d1.pdf [file c6ra14512d1.pdf]
